# Supplementary material for: Molecular modeling, density functional theory, ADME prediction and antimicrobial activity studies of 2-(substituted)oxazolo[4,5-b]pyridine derivatives
Source: Royal Society of Chemistry journal article supplement (doi:10.1039/d1nj00701g), 2021-01-01
Supplement: d1nj00701g1.pdf [file d1nj00701g1.pdf]

## Chemistry

Benzoic acid derivatives (1 mmol) and 2-amino-3-hydroxypyridine (1 mmol) were refluxed at 150°C for approximately 2 h in the presence of polyphosphoric acid (PPA). At the end of the period, the reaction contents were poured into ice and alkalinized with 10% NaOH solution and filtered. The products were finally recrystallized from ethanol. The chemicals used in the synthesis and purification of the compounds were obtained from Sigma-Aldrich, Acros Organics, Fluka, and Riedel de Haen and were used without purification. Compounds are not original, analysis data are given in the relevant literature by us and their purity checked.

**Table S1.** Calculated bond length (°) of **P5**, **P6** and **P7**

| <b>P5</b>          |              | <b>P6</b>          |              | <b>P7</b>          |              |
|--------------------|--------------|--------------------|--------------|--------------------|--------------|
| <b>Bond Length</b> | <b>B3LYP</b> | <b>Bond length</b> | <b>B3LYP</b> | <b>Bond length</b> | <b>B3LYP</b> |
| C1,C2              | 1.3967       | C1,C2              | 1.3967       | C1,C2              | 1.3967       |
| C1,C6              | 1.396        | C1,C6              | 1.396        | C1,C6              | 1.396        |
| C1,H18             | 1.1          | C1,H20             | 1.1          | C1,H21             | 1.1          |
| C2,N3              | 1.3547       | C2,C3              | 1.3547       | C2,N3              | 1.3547       |
| C2,H19             | 1.1          | C2,H21             | 1.1          | C2,H22             | 1.1          |
| N3,C4              | 1.3528       | N3,C4              | 1.3528       | N3,C4              | 1.3528       |
| C4,C5              | 1.3864       | C4,C5              | 1.3864       | C4,C5              | 1.3864       |
| C4,N7              | 1.366        | C4,N7              | 1.366        | C4,7               | 1.366        |
| C5,C6              | 1.3848       | C5,C6              | 1.3848       | C5,C6              | 1.3848       |
| C5,O9              | 1.3634       | C5,O9              | 1.3634       | C5,O9              | 1.3634       |
| C6,H20             | 1.1          | C6,H22             | 1.1          | C6,H23             | 1.1          |
| N7,C8              | 1.3159       | N7,C8              | 1.3159       | N7,C8              | 1.3159       |
| C8,O9              | 1.3662       | C8,O9              | 1.3662       | C8,O9              | 1.3662       |
| C8,C10             | 1.337        | C8,C10             | 1.337        | C8,C10             | 1.337        |
| C10,C11            | 1.3948       | C10,C11            | 1.3948       | C10,C11            | 1.3948       |
| C10,C14            | 1.3949       | C10,C14            | 1.3949       | C10,C14            | 1.3949       |
| C11,C12            | 1.3949       | C11,C12            | 1.3949       | C11,C12            | 1.3949       |
| C11,H21            | 1.1001       | C11,H23            | 1.1001       | C11,H24            | 1.1001       |
| C12,C15            | 1.3949       | C12,C15            | 1.3949       | C12,C15            | 1.3949       |
| C12,H22            | 1.1          | C12,H24            | 1.1          | C12,H25            | 1.1          |
| C13,C14            | 1.3948       | C13,C14            | 1.3948       | C13,C14            | 1.3948       |
| C13,C15            | 1.3947       | C13,C15            | 1.3947       | C13,C15            | 1.3947       |
| C13,H23            | 1.1001       | C13,H25            | 1.1001       | C13,H26            | 1.1001       |
| C14,H24            | 1.1          | C14,H26            | 1.1          | C14,H27            | 1.1          |
| C15,O16            | 1.3549       | C15,C16            | 1.497        | C15,O16            | 1.3549       |
| O16,C17            | 1.402        | C16,F17            | 1.3921       | O16,C17            | 1.402        |
| C17,H25            | 1.113        | C16,F18            | 1.3919       | C17,F18            | 1.392        |
| C17,H26            | 1.113        | C16,F19            | 1.392        | C17,F19            | 1.392        |
| C17,H27            | 1.113        |                    |              | C17,F20            | 1.3919       |

**Table S2.** Calculated bond angles (°) of **P5**, **P6** and **P7**

| <b>P5</b>         |              | <b>P6</b>         |              | <b>P7</b>         |              |
|-------------------|--------------|-------------------|--------------|-------------------|--------------|
| <b>Bond Angle</b> | <b>B3LYP</b> | <b>Bond Angle</b> | <b>B3LYP</b> | <b>Bond Angle</b> | <b>B3LYP</b> |
| C2,C1,C6          | 119.8391     | C2,C1,C6          | 119.8391     | C2,C1,C6          | 119.8391     |
| C2,1,H18          | 120.0795     | C2,C1,H20         | 120.0795     | C2,C1,H21         | 120.0795     |
| C6,1,H18          | 120.0814     | C6,C1,H20         | 120.0814     | C6,C1,H21         | 120.0814     |
| C1,C2,C3          | 125.9088     | C1,C2,N3          | 125.9088     | C1,C2,N3          | 125.9088     |
| C1,C2,H19         | 117.0452     | C1,C2,H21         | 117.0452     | C1,C2,H22         | 117.0452     |
| C3,C2,H19         | 117.046      | N3,C2,H21         | 117.046      | N3,C2,H22         | 117.046      |
| C2,C3,C4          | 113.641      | C2,N3,C4          | 113.641      | C2,N3,C4          | 113.641      |
| C3,C4,C5          | 123.2087     | N3,C4,C5          | 123.2087     | N3,C4,C5          | 123.2087     |
| C3,C4,N7          | 126.6528     | N3,C4,N           | 126.6528     | N3,C4,N7          | 126.6528     |
| C5,C4,N7          | 110.1384     | C5,C4,N7          | 110.1384     | C5,C4,N7          | 110.1384     |
| C4,C5,C6          | 123.3159     | C4,C5,6           | 123.3159     | C4,C5,C6          | 123.3159     |
| C4,C5,O9          | 107.8553     | C4,C5,O9          | 107.8553     | C4,C5,O9          | 107.8553     |
| C6,C5,O9          | 128.8288     | C6,C5,O9          | 128.8288     | C6,C5,O9          | 128.8288     |
| C1,C6,C5          | 114.0865     | C1,C6,C5          | 114.0865     | C1,C6,C5          | 114.0865     |
| C1,6,H20          | 122.9566     | C1,C6,H22         | 122.9566     | C1,C6,H23         | 122.9566     |
| C5,C6,H20         | 122.9569     | C5,C6,H22         | 122.9569     | C5,C6,H23         | 122.9569     |
| C4,N7,C8          | 102.9166     | C4,N7,C8          | 102.9166     | C4,N7,C8          | 102.9166     |
| N7,C8,O9          | 116.0044     | N7,C8,O9          | 116.0044     | N7,C8,O9          | 116.0044     |
| N7,C8,C10         | 121.9963     | N7,C8,C10         | 121.9963     | N7,C8,C10         | 121.9963     |
| O9,C8,10          | 121.9994     | O9,C8,C10         | 121.9994     | O9,C8,C10         | 121.9994     |
| C5,O9,C8          | 103.0853     | C5,O9,C8          | 103.0853     | C5,O9,C8          | 103.0853     |
| C8,C10,C11        | 120.0014     | C8,C10,C11        | 120.0014     | C8,C10,11         | 120.0014     |
| C8,C10,C14        | 120.0012     | C8,C10,C14        | 120.0012     | C8,C10,14         | 120.0012     |
| C11,C10,C14       | 119.9974     | C11,C10,C14       | 119.9974     | C11,C10,C14       | 119.9974     |
| C10,C11,C12       | 120.0024     | C10,C11,C12       | 120.0024     | C10,C11,C12       | 120.0024     |
| C10,C11,H21       | 119.9974     | C10,C11,H23       | 119.9974     | C10,C11,H24       | 119.9974     |
| C12,C11,H21       | 120.0002     | C12,C11,H23       | 120.0002     | C12,C11,H24       | 120.0002     |
| C11,C12,C15       | 119.9949     | C11,C12,C15       | 119.9949     | C11,C12,C15       | 119.9949     |
| C11,C12,H22       | 119.9988     | C11,C12,H24       | 119.9988     | C11,C12,H25       | 119.9988     |
| C15,C12,H22       | 120.0062     | C15,C12,H24       | 120.0062     | C15,C12,H25       | 120.0062     |
| C14,C13,C15       | 120.0015     | C14,C13,C15       | 120.0015     | C14,C13,C15       | 120.0015     |
| C14,C13,H23       | 120.0026     | C14,C13,H25       | 120.0026     | C14,C13,H26       | 120.0026     |
| C15,C13,H23       | 119.9959     | C15,C13,H25       | 119.9959     | C15,13,H26        | 119.9959     |
| C10,C14,C13       | 120.0014     | C10,C14,C13       | 120.0014     | C10,C14,C13       | 120.0014     |
| C10,C14,H24       | 119.9961     | C10,C14,H26       | 119.9961     | C10,C14,H27       | 119.9961     |
| C13,C14,H24       | 120.0025     | C13,C14,H26       | 120.0025     | C13,C14,H27       | 120.0025     |
| C12,C15,C13       | 120.0024     | C12,C15,C13       | 120.0024     | C12,C15,C13       | 120.0024     |
| C12,C15,O16       | 119.9947     | C12,C15,C16       | 119.9947     | C12,C15,O16       | 119.9947     |
| C13,C15,O16       | 120.0029     | C13,C15,C16       | 120.0029     | C13,C15,O16       | 120.0029     |
| C15,O16,C17       | 110.8009     | C15,C16,F17       | 110.8009     | C15,O16,C17       | 110.8009     |
| O16,C17,H25       | 109.5009     | C15,C16,F18       | 109.4441     | O16,C17,F18       | 109.503      |
| O16,C17,H26       | 109.4405     | C15,C16,F19       | 109.4626     | O16,C17,F19       | 109.4409     |
| O16,C17,H27       | 109.4625     | F17,C16,F18       | 109.4381     | O16,C17,F20       | 109.4589     |
| H25,C17,H26       | 109.4412     | F17,C16,F19       | 109.4599     | F18,C17,F19       | 109.4402     |
| H25,C17,H27       | 109.4598     | F18,C16,F19       | 109.5218     | F18,C17,F20       | 109.4626     |
| H26,C17,H27       | 109.5225     |                   |              | F19,C17,F20       | 109.5218     |

**Table S3. Summary of Natural Population Analysis**

| Natural Population |    |          |         |         |         |         |
|--------------------|----|----------|---------|---------|---------|---------|
| Atom               | No | Charge   | Core    | Valence | Rydberg | Total   |
| C                  | 1  | -0.23714 | 1.99915 | 4.22325 | 0.01474 | 6.23714 |
| C                  | 2  | 0.05487  | 1.99918 | 3.92104 | 0.02492 | 5.94513 |
| N                  | 3  | -0.43502 | 1.99935 | 5.41965 | 0.01602 | 7.43502 |
| C                  | 4  | 0.32359  | 1.99888 | 3.64599 | 0.03155 | 5.67641 |
| C                  | 5  | 0.24846  | 1.99866 | 3.72820 | 0.02468 | 5.75154 |
| C                  | 6  | -0.21015 | 1.99902 | 4.19651 | 0.01461 | 6.21015 |
| N                  | 7  | -0.48832 | 1.99932 | 5.47490 | 0.01410 | 7.48832 |
| C                  | 8  | 0.57278  | 1.99901 | 3.39206 | 0.03615 | 5.42722 |
| O                  | 9  | -0.48363 | 1.99970 | 6.47520 | 0.00872 | 8.48363 |
| C                  | 10 | -0.13942 | 1.99890 | 4.12467 | 0.01585 | 6.13942 |
| C                  | 11 | -0.14779 | 1.99905 | 4.13459 | 0.01415 | 6.14779 |
| C                  | 12 | -0.22923 | 1.99901 | 4.21440 | 0.01582 | 6.22923 |
| C                  | 13 | -0.25944 | 1.99899 | 4.24645 | 0.01399 | 6.25944 |
| C                  | 14 | -0.12667 | 1.99905 | 4.11299 | 0.01462 | 6.12667 |
| C                  | 15 | 0.32040  | 1.99868 | 3.65879 | 0.02213 | 5.67960 |
| O                  | 16 | -0.55181 | 1.99963 | 6.54204 | 0.01014 | 8.55181 |
| C                  | 17 | 1.32015  | 1.99962 | 2.60694 | 0.07329 | 4.67985 |
| F                  | 18 | -0.33703 | 1.99991 | 7.33250 | 0.00462 | 9.33703 |
| F                  | 19 | -0.36160 | 1.99992 | 7.35732 | 0.00436 | 9.36160 |
| F                  | 20 | -0.35676 | 1.99992 | 7.35245 | 0.00440 | 9.35676 |
| H                  | 21 | 0.21034  | 0.00000 | 0.78757 | 0.00209 | 0.78966 |
| H                  | 22 | 0.18564  | 0.00000 | 0.81227 | 0.00209 | 0.81436 |
| H                  | 23 | 0.22116  | 0.00000 | 0.77607 | 0.00277 | 0.77884 |
| H                  | 24 | 0.22136  | 0.00000 | 0.77592 | 0.00272 | 0.77864 |
| H                  | 25 | 0.22460  | 0.00000 | 0.77257 | 0.00283 | 0.77540 |
| H                  | 26 | 0.22858  | 0.00000 | 0.76833 | 0.00309 | 0.77142 |
| H                  | 27 | 0.23209  | 0.00000 | 0.76492 | 0.00299 | 0.76791 |

**Table S4. Second Order Perturbation Theory Analysis of Fock Matrix in NBO Basis of P7**

| Donor NBO (i)         | Acceptor NBO (j)         | E(2) E(j)-E(i) F(i,j) |      |       |
|-----------------------|--------------------------|-----------------------|------|-------|
|                       |                          | kcal/mol              | a.u. | a.u.  |
| 1. BD ( 1) C 1 - C 2  | /100. RY*( 2) N 3        | 1.30                  | 2.07 | 0.046 |
| 1. BD ( 1) C 1 - C 2  | /138. RY*( 1) C 6        | 0.62                  | 2.05 | 0.032 |
| 1. BD ( 1) C 1 - C 2  | /139. RY*( 2) C 6        | 1.61                  | 2.16 | 0.053 |
| 1. BD ( 1) C 1 - C 2  | /369. BD*( 1) C 1 - C 6  | 2.47                  | 1.26 | 0.050 |
| 1. BD ( 1) C 1 - C 2  | /371. BD*( 1) C 1 - H 21 | 1.11                  | 1.15 | 0.032 |
| 1. BD ( 1) C 1 - C 2  | /372. BD*( 1) C 2 - N 3  | 1.49                  | 1.25 | 0.038 |
| 1. BD ( 1) C 1 - C 2  | /374. BD*( 1) C 2 - H 22 | 1.06                  | 1.15 | 0.031 |
| 1. BD ( 1) C 1 - C 2  | /381. BD*( 1) C 6 - H 23 | 2.71                  | 1.14 | 0.049 |
| 2. BD ( 1) C 1 - C 6  | / 86. RY*( 1) C 2        | 1.65                  | 1.91 | 0.050 |
| 2. BD ( 1) C 1 - C 6  | / 90. RY*( 5) C 2        | 0.63                  | 3.65 | 0.043 |
| 2. BD ( 1) C 1 - C 6  | /125. RY*( 1) C 5        | 1.67                  | 2.28 | 0.055 |
| 2. BD ( 1) C 1 - C 6  | /368. BD*( 1) C 1 - C 2  | 2.27                  | 1.26 | 0.048 |
| 2. BD ( 1) C 1 - C 6  | /371. BD*( 1) C 1 - H 21 | 1.02                  | 1.15 | 0.031 |
| 2. BD ( 1) C 1 - C 6  | /374. BD*( 1) C 2 - H 22 | 1.90                  | 1.15 | 0.042 |
| 2. BD ( 1) C 1 - C 6  | /379. BD*( 1) C 5 - C 6  | 3.17                  | 1.27 | 0.057 |
| 2. BD ( 1) C 1 - C 6  | /380. BD*( 1) C 5 - O 9  | 7.66                  | 1.05 | 0.080 |
| 2. BD ( 1) C 1 - C 6  | /381. BD*( 1) C 6 - H 23 | 1.27                  | 1.14 | 0.034 |
| 3. BD ( 2) C 1 - C 6  | / 89. RY*( 4) C 2        | 1.59                  | 1.20 | 0.043 |
| 3. BD ( 2) C 1 - C 6  | /129. RY*( 5) C 5        | 1.48                  | 1.17 | 0.041 |
| 3. BD ( 2) C 1 - C 6  | /373. BD*( 2) C 2 - N 3  | 25.39                 | 0.27 | 0.075 |
| 3. BD ( 2) C 1 - C 6  | /377. BD*( 2) C 4 - C 5  | 19.92                 | 0.28 | 0.068 |
| 4. BD ( 1) C 1 - H 21 | / 87. RY*( 2) C 2        | 1.26                  | 1.60 | 0.040 |
| 4. BD ( 1) C 1 - H 21 | /138. RY*( 1) C 6        | 1.41                  | 1.86 | 0.046 |
| 4. BD ( 1) C 1 - H 21 | /368. BD*( 1) C 1 - C 2  | 0.57                  | 1.08 | 0.022 |
| 4. BD ( 1) C 1 - H 21 | /369. BD*( 1) C 1 - C 6  | 0.59                  | 1.08 | 0.023 |
| 4. BD ( 1) C 1 - H 21 | /372. BD*( 1) C 2 - N 3  | 4.54                  | 1.07 | 0.062 |
| 4. BD ( 1) C 1 - H 21 | /374. BD*( 1) C 2 - H 22 | 0.64                  | 0.97 | 0.022 |
| 4. BD ( 1) C 1 - H 21 | /379. BD*( 1) C 5 - C 6  | 3.47                  | 1.09 | 0.055 |
| 4. BD ( 1) C 1 - H 21 | /381. BD*( 1) C 6 - H 23 | 0.52                  | 0.95 | 0.020 |
| 5. BD ( 1) C 2 - N 3  | / 74. RY*( 2) C 1        | 1.12                  | 2.33 | 0.046 |
| 5. BD ( 1) C 2 - N 3  | /112. RY*( 1) C 4        | 1.54                  | 1.85 | 0.048 |
| 5. BD ( 1) C 2 - N 3  | /113. RY*( 2) C 4        | 1.46                  | 2.27 | 0.052 |
| 5. BD ( 1) C 2 - N 3  | /368. BD*( 1) C 1 - C 2  | 1.70                  | 1.37 | 0.043 |
| 5. BD ( 1) C 2 - N 3  | /371. BD*( 1) C 1 - H 21 | 1.29                  | 1.26 | 0.036 |
| 5. BD ( 1) C 2 - N 3  | /375. BD*( 1) N 3 - C 4  | 1.08                  | 1.36 | 0.034 |
| 5. BD ( 1) C 2 - N 3  | /378. BD*( 1) C 4 - N 7  | 6.00                  | 1.27 | 0.078 |
| 6. BD ( 2) C 2 - N 3  | / 77. RY*( 5) C 1        | 0.56                  | 1.73 | 0.030 |
| 6. BD ( 2) C 2 - N 3  | /115. RY*( 4) C 4        | 1.18                  | 1.91 | 0.045 |
| 6. BD ( 2) C 2 - N 3  | /116. RY*( 5) C 4        | 1.15                  | 1.26 | 0.036 |
| 6. BD ( 2) C 2 - N 3  | /370. BD*( 2) C 1 - C 6  | 13.91                 | 0.31 | 0.060 |
| 6. BD ( 2) C 2 - N 3  | /377. BD*( 2) C 4 - C 5  | 26.38                 | 0.31 | 0.084 |
| 7. BD ( 1) C 2 - H 22 | / 73. RY*( 1) C 1        | 0.97                  | 1.81 | 0.037 |
| 7. BD ( 1) C 2 - H 22 | / 99. RY*( 1) N 3        | 1.16                  | 1.37 | 0.036 |
| 7. BD ( 1) C 2 - H 22 | /369. BD*( 1) C 1 - C 6  | 4.07                  | 1.07 | 0.059 |
| 7. BD ( 1) C 2 - H 22 | /371. BD*( 1) C 1 - H 21 | 0.67                  | 0.96 | 0.023 |
| 7. BD ( 1) C 2 - H 22 | /375. BD*( 1) N 3 - C 4  | 5.04                  | 1.06 | 0.065 |
| 8. BD ( 1) N 3 - C 4  | / 87. RY*( 2) C 2        | 3.34                  | 1.91 | 0.071 |
| 8. BD ( 1) N 3 - C 4  | /372. BD*( 1) C 2 - N 3  | 0.93                  | 1.38 | 0.032 |

|                        |                          |       |      |       |
|------------------------|--------------------------|-------|------|-------|
| 8. BD ( 1) N 3 - C 4   | /374. BD*( 1) C 2 - H 22 | 2.09  | 1.28 | 0.046 |
| 8. BD ( 1) N 3 - C 4   | /376. BD*( 1) C 4 - C 5  | 2.59  | 1.36 | 0.053 |
| 8. BD ( 1) N 3 - C 4   | /378. BD*( 1) C 4 - N 7  | 1.88  | 1.29 | 0.044 |
| 8. BD ( 1) N 3 - C 4   | /380. BD*( 1) C 5 - O 9  | 0.92  | 1.17 | 0.029 |
| 8. BD ( 1) N 3 - C 4   | /382. BD*( 1) N 7 - C 8  | 1.13  | 1.41 | 0.036 |
| 9. BD ( 1) C 4 - C 5   | /100. RY*( 2) N 3        | 1.13  | 2.06 | 0.043 |
| 9. BD ( 1) C 4 - C 5   | /138. RY*( 1) C 6        | 1.00  | 2.04 | 0.040 |
| 9. BD ( 1) C 4 - C 5   | /139. RY*( 2) C 6        | 1.12  | 2.16 | 0.044 |
| 9. BD ( 1) C 4 - C 5   | /152. RY*( 2) N 7        | 0.76  | 2.11 | 0.036 |
| 9. BD ( 1) C 4 - C 5   | /165. RY*( 2) C 8        | 0.75  | 2.10 | 0.035 |
| 9. BD ( 1) C 4 - C 5   | /169. RY*( 6) C 8        | 0.60  | 2.14 | 0.032 |
| 9. BD ( 1) C 4 - C 5   | /375. BD*( 1) N 3 - C 4  | 2.89  | 1.25 | 0.054 |
| 9. BD ( 1) C 4 - C 5   | /378. BD*( 1) C 4 - N 7  | 0.81  | 1.16 | 0.027 |
| 9. BD ( 1) C 4 - C 5   | /379. BD*( 1) C 5 - C 6  | 5.17  | 1.27 | 0.072 |
| 9. BD ( 1) C 4 - C 5   | /381. BD*( 1) C 6 - H 23 | 2.88  | 1.13 | 0.051 |
| 9. BD ( 1) C 4 - C 5   | /385. BD*( 1) C 8 - C 10 | 1.45  | 1.17 | 0.037 |
| 10. BD ( 2) C 4 - C 5  | /101. RY*( 3) N 3        | 1.38  | 1.08 | 0.039 |
| 10. BD ( 2) C 4 - C 5  | /141. RY*( 4) C 6        | 1.90  | 0.82 | 0.040 |
| 10. BD ( 2) C 4 - C 5  | /153. RY*( 3) N 7        | 0.86  | 1.15 | 0.032 |
| 10. BD ( 2) C 4 - C 5  | /178. RY*( 2) O 9        | 0.85  | 1.26 | 0.033 |
| 10. BD ( 2) C 4 - C 5  | /370. BD*( 2) C 1 - C 6  | 21.30 | 0.29 | 0.072 |
| 10. BD ( 2) C 4 - C 5  | /373. BD*( 2) C 2 - N 3  | 16.24 | 0.28 | 0.061 |
| 10. BD ( 2) C 4 - C 5  | /383. BD*( 2) N 7 - C 8  | 9.65  | 0.28 | 0.048 |
| 11. BD ( 1) C 4 - N 7  | /99. RY*( 1) N 3         | 0.56  | 1.62 | 0.027 |
| 11. BD ( 1) C 4 - N 7  | /164. RY*( 1) C 8        | 0.63  | 1.96 | 0.031 |
| 11. BD ( 1) C 4 - N 7  | /165. RY*( 2) C 8        | 1.37  | 2.16 | 0.049 |
| 11. BD ( 1) C 4 - N 7  | /372. BD*( 1) C 2 - N 3  | 2.15  | 1.31 | 0.048 |
| 11. BD ( 1) C 4 - N 7  | /375. BD*( 1) N 3 - C 4  | 1.92  | 1.31 | 0.045 |
| 11. BD ( 1) C 4 - N 7  | /376. BD*( 1) C 4 - C 5  | 0.96  | 1.29 | 0.032 |
| 11. BD ( 1) C 4 - N 7  | /379. BD*( 1) C 5 - C 6  | 2.71  | 1.33 | 0.054 |
| 11. BD ( 1) C 4 - N 7  | /380. BD*( 1) C 5 - O 9  | 0.92  | 1.10 | 0.029 |
| 11. BD ( 1) C 4 - N 7  | /382. BD*( 1) N 7 - C 8  | 0.71  | 1.34 | 0.028 |
| 11. BD ( 1) C 4 - N 7  | /384. BD*( 1) C 8 - O 9  | 1.72  | 1.07 | 0.039 |
| 11. BD ( 1) C 4 - N 7  | /385. BD*( 1) C 8 - C 10 | 7.62  | 1.23 | 0.087 |
| 12. BD ( 1) C 5 - C 6  | /73. RY*( 1) C 1         | 1.34  | 2.03 | 0.047 |
| 12. BD ( 1) C 5 - C 6  | /74. RY*( 2) C 1         | 0.81  | 2.25 | 0.038 |
| 12. BD ( 1) C 5 - C 6  | /113. RY*( 2) C 4        | 0.57  | 2.19 | 0.032 |
| 12. BD ( 1) C 5 - C 6  | /369. BD*( 1) C 1 - C 6  | 2.66  | 1.29 | 0.052 |
| 12. BD ( 1) C 5 - C 6  | /371. BD*( 1) C 1 - H 21 | 2.59  | 1.18 | 0.050 |
| 12. BD ( 1) C 5 - C 6  | /376. BD*( 1) C 4 - C 5  | 4.60  | 1.25 | 0.068 |
| 12. BD ( 1) C 5 - C 6  | /378. BD*( 1) C 4 - N 7  | 1.15  | 1.19 | 0.033 |
| 12. BD ( 1) C 5 - C 6  | /380. BD*( 1) C 5 - O 9  | 1.50  | 1.07 | 0.036 |
| 12. BD ( 1) C 5 - C 6  | /381. BD*( 1) C 6 - H 23 | 1.36  | 1.16 | 0.036 |
| 12. BD ( 1) C 5 - C 6  | /384. BD*( 1) C 8 - O 9  | 2.00  | 1.04 | 0.041 |
| 13. BD ( 1) C 5 - O 9  | /138. RY*( 1) C 6        | 0.51  | 2.25 | 0.030 |
| 13. BD ( 1) C 5 - O 9  | /164. RY*( 1) C 8        | 1.11  | 2.11 | 0.043 |
| 13. BD ( 1) C 5 - O 9  | /369. BD*( 1) C 1 - C 6  | 0.72  | 1.47 | 0.029 |
| 13. BD ( 1) C 5 - O 9  | /375. BD*( 1) N 3 - C 4  | 2.38  | 1.46 | 0.053 |
| 13. BD ( 1) C 5 - O 9  | /376. BD*( 1) C 4 - C 5  | 0.51  | 1.44 | 0.024 |
| 13. BD ( 1) C 5 - O 9  | /379. BD*( 1) C 5 - C 6  | 1.44  | 1.48 | 0.041 |
| 13. BD ( 1) C 5 - O 9  | /385. BD*( 1) C 8 - C 10 | 3.19  | 1.38 | 0.060 |
| 14. BD ( 1) C 6 - H 23 | /73. RY*( 1) C 1         | 1.19  | 1.83 | 0.042 |

|                         |                           |       |      |       |
|-------------------------|---------------------------|-------|------|-------|
| 14. BD ( 1) C 6 - H 23  | /126. RY*( 2) C 5         | 0.77  | 1.84 | 0.034 |
| 14. BD ( 1) C 6 - H 23  | /128. RY*( 4) C 5         | 0.69  | 2.39 | 0.037 |
| 14. BD ( 1) C 6 - H 23  | /368. BD*( 1) C 1 - C 2   | 3.32  | 1.09 | 0.054 |
| 14. BD ( 1) C 6 - H 23  | /369. BD*( 1) C 1 - C 6   | 0.99  | 1.10 | 0.030 |
| 14. BD ( 1) C 6 - H 23  | /371. BD*( 1) C 1 - H 21  | 0.54  | 0.99 | 0.021 |
| 14. BD ( 1) C 6 - H 23  | /376. BD*( 1) C 4 - C 5   | 3.76  | 1.06 | 0.057 |
| 14. BD ( 1) C 6 - H 23  | /379. BD*( 1) C 5 - C 6   | 0.73  | 1.11 | 0.025 |
| 15. BD ( 1) N 7 - C 8   | /112. RY*( 1) C 4         | 1.32  | 1.91 | 0.045 |
| 15. BD ( 1) N 7 - C 8   | /114. RY*( 3) C 4         | 1.51  | 2.69 | 0.057 |
| 15. BD ( 1) N 7 - C 8   | /164. RY*( 1) C 8         | 0.76  | 2.07 | 0.035 |
| 15. BD ( 1) N 7 - C 8   | /191. RY*( 2) C 10        | 1.58  | 2.50 | 0.056 |
| 15. BD ( 1) N 7 - C 8   | /375. BD*( 1) N 3 - C 4   | 5.53  | 1.42 | 0.079 |
| 15. BD ( 1) N 7 - C 8   | /378. BD*( 1) C 4 - N 7   | 0.78  | 1.33 | 0.029 |
| 15. BD ( 1) N 7 - C 8   | /385. BD*( 1) C 8 - C 10  | 4.03  | 1.34 | 0.066 |
| 15. BD ( 1) N 7 - C 8   | /386. BD*( 1) C 10 - C 11 | 1.54  | 1.42 | 0.042 |
| 16. BD ( 2) N 7 - C 8   | / 60. LP ( 1) C 10        | 15.20 | 0.21 | 0.068 |
| 16. BD ( 2) N 7 - C 8   | /115. RY*( 4) C 4         | 1.48  | 1.94 | 0.050 |
| 16. BD ( 2) N 7 - C 8   | /116. RY*( 5) C 4         | 0.61  | 1.29 | 0.026 |
| 16. BD ( 2) N 7 - C 8   | /192. RY*( 3) C 10        | 1.08  | 0.97 | 0.030 |
| 16. BD ( 2) N 7 - C 8   | /377. BD*( 2) C 4 - C 5   | 17.13 | 0.34 | 0.074 |
| 16. BD ( 2) N 7 - C 8   | /383. BD*( 2) N 7 - C 8   | 0.53  | 0.34 | 0.012 |
| 17. BD ( 1) C 8 - O 9   | /125. RY*( 1) C 5         | 1.70  | 2.47 | 0.058 |
| 17. BD ( 1) C 8 - O 9   | /128. RY*( 4) C 5         | 1.19  | 2.74 | 0.051 |
| 17. BD ( 1) C 8 - O 9   | /164. RY*( 1) C 8         | 0.58  | 2.09 | 0.031 |
| 17. BD ( 1) C 8 - O 9   | /191. RY*( 2) C 10        | 1.41  | 2.52 | 0.053 |
| 17. BD ( 1) C 8 - O 9   | /375. BD*( 1) N 3 - C 4   | 0.68  | 1.44 | 0.028 |
| 17. BD ( 1) C 8 - O 9   | /379. BD*( 1) C 5 - C 6   | 4.86  | 1.46 | 0.075 |
| 17. BD ( 1) C 8 - O 9   | /385. BD*( 1) C 8 - C 10  | 0.53  | 1.36 | 0.024 |
| 17. BD ( 1) C 8 - O 9   | /387. BD*( 1) C 10 - C 14 | 1.67  | 1.45 | 0.044 |
| 18. BD ( 1) C 8 - C 10  | /151. RY*( 1) N 7         | 0.91  | 1.64 | 0.035 |
| 18. BD ( 1) C 8 - C 10  | /177. RY*( 1) O 9         | 0.54  | 1.86 | 0.028 |
| 18. BD ( 1) C 8 - C 10  | /203. RY*( 1) C 11        | 1.51  | 2.06 | 0.050 |
| 18. BD ( 1) C 8 - C 10  | /242. RY*( 1) C 14        | 1.45  | 2.05 | 0.049 |
| 18. BD ( 1) C 8 - C 10  | /378. BD*( 1) C 4 - N 7   | 2.60  | 1.15 | 0.049 |
| 18. BD ( 1) C 8 - C 10  | /380. BD*( 1) C 5 - O 9   | 2.26  | 1.03 | 0.043 |
| 18. BD ( 1) C 8 - C 10  | /382. BD*( 1) N 7 - C 8   | 3.52  | 1.27 | 0.060 |
| 18. BD ( 1) C 8 - C 10  | /386. BD*( 1) C 10 - C 11 | 3.12  | 1.24 | 0.056 |
| 18. BD ( 1) C 8 - C 10  | /387. BD*( 1) C 10 - C 14 | 2.82  | 1.25 | 0.053 |
| 18. BD ( 1) C 8 - C 10  | /388. BD*( 1) C 11 - C 12 | 1.90  | 1.27 | 0.044 |
| 18. BD ( 1) C 8 - C 10  | /393. BD*( 1) C 13 - C 14 | 2.17  | 1.27 | 0.047 |
| 19. BD ( 1) C 10 - C 11 | /164. RY*( 1) C 8         | 1.07  | 1.90 | 0.040 |
| 19. BD ( 1) C 10 - C 11 | /165. RY*( 2) C 8         | 0.63  | 2.10 | 0.033 |
| 19. BD ( 1) C 10 - C 11 | /217. RY*( 2) C 12        | 1.92  | 2.10 | 0.057 |
| 19. BD ( 1) C 10 - C 11 | /242. RY*( 1) C 14        | 0.56  | 2.06 | 0.030 |
| 19. BD ( 1) C 10 - C 11 | /382. BD*( 1) N 7 - C 8   | 2.52  | 1.28 | 0.051 |
| 19. BD ( 1) C 10 - C 11 | /385. BD*( 1) C 8 - C 10  | 2.95  | 1.17 | 0.053 |
| 19. BD ( 1) C 10 - C 11 | /387. BD*( 1) C 10 - C 14 | 4.67  | 1.26 | 0.068 |
| 19. BD ( 1) C 10 - C 11 | /388. BD*( 1) C 11 - C 12 | 2.97  | 1.28 | 0.055 |
| 19. BD ( 1) C 10 - C 11 | /390. BD*( 1) C 11 - H 24 | 1.17  | 1.15 | 0.033 |
| 19. BD ( 1) C 10 - C 11 | /392. BD*( 1) C 12 - H 25 | 2.38  | 1.14 | 0.047 |
| 19. BD ( 1) C 10 - C 11 | /397. BD*( 1) C 14 - H 27 | 2.14  | 1.16 | 0.045 |
| 20. BD ( 1) C 10 - C 14 | /164. RY*( 1) C 8         | 1.67  | 1.89 | 0.050 |

|                         |                           |       |      |       |
|-------------------------|---------------------------|-------|------|-------|
| 20. BD ( 1) C 10 - C 14 | /203. RY*( 1) C 11        | 0.51  | 2.07 | 0.029 |
| 20. BD ( 1) C 10 - C 14 | /229. RY*( 1) C 13        | 0.79  | 2.08 | 0.037 |
| 20. BD ( 1) C 10 - C 14 | /230. RY*( 2) C 13        | 1.35  | 2.10 | 0.048 |
| 20. BD ( 1) C 10 - C 14 | /384. BD*( 1) C 8 - O 9   | 3.13  | 1.00 | 0.050 |
| 20. BD ( 1) C 10 - C 14 | /385. BD*( 1) C 8 - C 10  | 3.17  | 1.17 | 0.054 |
| 20. BD ( 1) C 10 - C 14 | /386. BD*( 1) C 10 - C 11 | 4.69  | 1.25 | 0.068 |
| 20. BD ( 1) C 10 - C 14 | /390. BD*( 1) C 11 - H 24 | 2.34  | 1.15 | 0.046 |
| 20. BD ( 1) C 10 - C 14 | /393. BD*( 1) C 13 - C 14 | 2.88  | 1.28 | 0.054 |
| 20. BD ( 1) C 10 - C 14 | /396. BD*( 1) C 13 - H 26 | 2.23  | 1.14 | 0.045 |
| 20. BD ( 1) C 10 - C 14 | /397. BD*( 1) C 14 - H 27 | 1.16  | 1.15 | 0.033 |
| 21. BD ( 1) C 11 - C 12 | /190. RY*( 1) C 10        | 1.08  | 2.46 | 0.046 |
| 21. BD ( 1) C 11 - C 12 | /191. RY*( 2) C 10        | 1.01  | 2.34 | 0.044 |
| 21. BD ( 1) C 11 - C 12 | /255. RY*( 1) C 15        | 0.89  | 2.09 | 0.039 |
| 21. BD ( 1) C 11 - C 12 | /256. RY*( 2) C 15        | 1.05  | 2.19 | 0.043 |
| 21. BD ( 1) C 11 - C 12 | /385. BD*( 1) C 8 - C 10  | 3.70  | 1.18 | 0.059 |
| 21. BD ( 1) C 11 - C 12 | /386. BD*( 1) C 10 - C 11 | 3.50  | 1.26 | 0.059 |
| 21. BD ( 1) C 11 - C 12 | /390. BD*( 1) C 11 - H 24 | 1.09  | 1.16 | 0.032 |
| 21. BD ( 1) C 11 - C 12 | /391. BD*( 1) C 12 - C 15 | 3.15  | 1.26 | 0.056 |
| 21. BD ( 1) C 11 - C 12 | /392. BD*( 1) C 12 - H 25 | 1.40  | 1.15 | 0.036 |
| 21. BD ( 1) C 11 - C 12 | /398. BD*( 1) C 15 - O 16 | 3.68  | 1.01 | 0.055 |
| 22. BD ( 2) C 11 - C 12 | / 60. LP ( 1) C 10        | 44.11 | 0.14 | 0.090 |
| 22. BD ( 2) C 11 - C 12 | / 61. LP*( 1) C 15        | 60.90 | 0.12 | 0.095 |
| 22. BD ( 2) C 11 - C 12 | /192. RY*( 3) C 10        | 0.50  | 0.91 | 0.021 |
| 22. BD ( 2) C 11 - C 12 | /259. RY*( 5) C 15        | 0.92  | 1.05 | 0.030 |
| 23. BD ( 1) C 11 - H 24 | /190. RY*( 1) C 10        | 2.21  | 2.27 | 0.063 |
| 23. BD ( 1) C 11 - H 24 | /216. RY*( 1) C 12        | 1.44  | 1.91 | 0.047 |
| 23. BD ( 1) C 11 - H 24 | /386. BD*( 1) C 10 - C 11 | 0.70  | 1.08 | 0.024 |
| 23. BD ( 1) C 11 - H 24 | /387. BD*( 1) C 10 - C 14 | 4.44  | 1.08 | 0.062 |
| 23. BD ( 1) C 11 - H 24 | /388. BD*( 1) C 11 - C 12 | 0.82  | 1.10 | 0.027 |
| 23. BD ( 1) C 11 - H 24 | /391. BD*( 1) C 12 - C 15 | 3.96  | 1.08 | 0.058 |
| 23. BD ( 1) C 11 - H 24 | /392. BD*( 1) C 12 - H 25 | 0.68  | 0.96 | 0.023 |
| 24. BD ( 1) C 12 - C 15 | /203. RY*( 1) C 11        | 0.58  | 2.09 | 0.031 |
| 24. BD ( 1) C 12 - C 15 | /204. RY*( 2) C 11        | 1.57  | 1.97 | 0.050 |
| 24. BD ( 1) C 12 - C 15 | /229. RY*( 1) C 13        | 0.81  | 2.10 | 0.037 |
| 24. BD ( 1) C 12 - C 15 | /230. RY*( 2) C 13        | 0.55  | 2.12 | 0.031 |
| 24. BD ( 1) C 12 - C 15 | /268. RY*( 1) O 16        | 0.85  | 1.87 | 0.036 |
| 24. BD ( 1) C 12 - C 15 | /388. BD*( 1) C 11 - C 12 | 3.05  | 1.30 | 0.056 |
| 24. BD ( 1) C 12 - C 15 | /390. BD*( 1) C 11 - H 24 | 2.24  | 1.17 | 0.046 |
| 24. BD ( 1) C 12 - C 15 | /392. BD*( 1) C 12 - H 25 | 1.26  | 1.16 | 0.034 |
| 24. BD ( 1) C 12 - C 15 | /395. BD*( 1) C 13 - C 15 | 4.71  | 1.27 | 0.069 |
| 24. BD ( 1) C 12 - C 15 | /396. BD*( 1) C 13 - H 26 | 2.28  | 1.17 | 0.046 |
| 24. BD ( 1) C 12 - C 15 | /399. BD*( 1) O 16 - C 17 | 3.10  | 1.02 | 0.051 |
| 25. BD ( 1) C 12 - H 25 | /203. RY*( 1) C 11        | 1.34  | 1.89 | 0.045 |
| 25. BD ( 1) C 12 - H 25 | /255. RY*( 1) C 15        | 1.02  | 1.90 | 0.039 |
| 25. BD ( 1) C 12 - H 25 | /386. BD*( 1) C 10 - C 11 | 3.96  | 1.08 | 0.058 |
| 25. BD ( 1) C 12 - H 25 | /388. BD*( 1) C 11 - C 12 | 1.00  | 1.10 | 0.030 |
| 25. BD ( 1) C 12 - H 25 | /390. BD*( 1) C 11 - H 24 | 0.68  | 0.97 | 0.023 |
| 25. BD ( 1) C 12 - H 25 | /391. BD*( 1) C 12 - C 15 | 0.68  | 1.08 | 0.024 |
| 25. BD ( 1) C 12 - H 25 | /395. BD*( 1) C 13 - C 15 | 4.52  | 1.07 | 0.062 |
| 25. BD ( 1) C 12 - H 25 | /398. BD*( 1) C 15 - O 16 | 1.48  | 0.82 | 0.031 |
| 26. BD ( 1) C 13 - C 14 | /190. RY*( 1) C 10        | 1.28  | 2.46 | 0.050 |
| 26. BD ( 1) C 13 - C 14 | /191. RY*( 2) C 10        | 0.85  | 2.34 | 0.040 |

|                         |                           |       |      |       |
|-------------------------|---------------------------|-------|------|-------|
| 26. BD ( 1) C 13 - C 14 | /256. RY*( 2) C 15        | 1.68  | 2.18 | 0.054 |
| 26. BD ( 1) C 13 - C 14 | /385. BD*( 1) C 8 - C 10  | 3.32  | 1.18 | 0.056 |
| 26. BD ( 1) C 13 - C 14 | /387. BD*( 1) C 10 - C 14 | 3.37  | 1.27 | 0.058 |
| 26. BD ( 1) C 13 - C 14 | /395. BD*( 1) C 13 - C 15 | 3.62  | 1.26 | 0.060 |
| 26. BD ( 1) C 13 - C 14 | /396. BD*( 1) C 13 - H 26 | 1.46  | 1.15 | 0.037 |
| 26. BD ( 1) C 13 - C 14 | /397. BD*( 1) C 14 - H 27 | 1.05  | 1.17 | 0.031 |
| 26. BD ( 1) C 13 - C 14 | /398. BD*( 1) C 15 - O 16 | 5.37  | 1.00 | 0.066 |
| 27. BD ( 2) C 13 - C 14 | / 60. LP ( 1) C 10        | 43.82 | 0.14 | 0.088 |
| 27. BD ( 2) C 13 - C 14 | / 61. LP*( 1) C 15        | 64.91 | 0.12 | 0.097 |
| 27. BD ( 2) C 13 - C 14 | /192. RY*( 3) C 10        | 0.60  | 0.90 | 0.023 |
| 27. BD ( 2) C 13 - C 14 | /259. RY*( 5) C 15        | 0.76  | 1.05 | 0.028 |
| 28. BD ( 1) C 13 - C 15 | /216. RY*( 1) C 12        | 1.23  | 2.11 | 0.046 |
| 28. BD ( 1) C 13 - C 15 | /217. RY*( 2) C 12        | 0.64  | 2.13 | 0.033 |
| 28. BD ( 1) C 13 - C 15 | /242. RY*( 1) C 14        | 0.60  | 2.09 | 0.032 |
| 28. BD ( 1) C 13 - C 15 | /243. RY*( 2) C 14        | 1.55  | 1.97 | 0.050 |
| 28. BD ( 1) C 13 - C 15 | /391. BD*( 1) C 12 - C 15 | 4.91  | 1.28 | 0.071 |
| 28. BD ( 1) C 13 - C 15 | /392. BD*( 1) C 12 - H 25 | 1.88  | 1.17 | 0.042 |
| 28. BD ( 1) C 13 - C 15 | /393. BD*( 1) C 13 - C 14 | 3.30  | 1.31 | 0.059 |
| 28. BD ( 1) C 13 - C 15 | /396. BD*( 1) C 13 - H 26 | 1.37  | 1.17 | 0.036 |
| 28. BD ( 1) C 13 - C 15 | /397. BD*( 1) C 14 - H 27 | 2.12  | 1.19 | 0.045 |
| 29. BD ( 1) C 13 - H 26 | /242. RY*( 1) C 14        | 1.41  | 1.89 | 0.046 |
| 29. BD ( 1) C 13 - H 26 | /255. RY*( 1) C 15        | 1.59  | 1.91 | 0.049 |
| 29. BD ( 1) C 13 - H 26 | /387. BD*( 1) C 10 - C 14 | 4.02  | 1.09 | 0.059 |
| 29. BD ( 1) C 13 - H 26 | /391. BD*( 1) C 12 - C 15 | 4.17  | 1.08 | 0.060 |
| 29. BD ( 1) C 13 - H 26 | /393. BD*( 1) C 13 - C 14 | 1.18  | 1.11 | 0.032 |
| 29. BD ( 1) C 13 - H 26 | /395. BD*( 1) C 13 - C 15 | 0.65  | 1.08 | 0.024 |
| 29. BD ( 1) C 13 - H 26 | /397. BD*( 1) C 14 - H 27 | 0.65  | 0.99 | 0.023 |
| 29. BD ( 1) C 13 - H 26 | /398. BD*( 1) C 15 - O 16 | 0.90  | 0.82 | 0.024 |
| 30. BD ( 1) C 14 - H 27 | /190. RY*( 1) C 10        | 2.17  | 2.26 | 0.063 |
| 30. BD ( 1) C 14 - H 27 | /229. RY*( 1) C 13        | 1.37  | 1.90 | 0.046 |
| 30. BD ( 1) C 14 - H 27 | /386. BD*( 1) C 10 - C 11 | 4.62  | 1.07 | 0.063 |
| 30. BD ( 1) C 14 - H 27 | /387. BD*( 1) C 10 - C 14 | 0.74  | 1.07 | 0.025 |
| 30. BD ( 1) C 14 - H 27 | /393. BD*( 1) C 13 - C 14 | 0.82  | 1.09 | 0.027 |
| 30. BD ( 1) C 14 - H 27 | /395. BD*( 1) C 13 - C 15 | 4.17  | 1.06 | 0.060 |
| 30. BD ( 1) C 14 - H 27 | /396. BD*( 1) C 13 - H 26 | 0.75  | 0.96 | 0.024 |
| 31. BD ( 1) C 15 - O 16 | /216. RY*( 1) C 12        | 0.74  | 2.30 | 0.037 |
| 31. BD ( 1) C 15 - O 16 | /281. RY*( 1) C 17        | 1.30  | 1.92 | 0.045 |
| 31. BD ( 1) C 15 - O 16 | /289. RY*( 9) C 17        | 1.10  | 3.32 | 0.054 |
| 31. BD ( 1) C 15 - O 16 | /388. BD*( 1) C 11 - C 12 | 1.49  | 1.49 | 0.042 |
| 31. BD ( 1) C 15 - O 16 | /393. BD*( 1) C 13 - C 14 | 1.11  | 1.49 | 0.036 |
| 31. BD ( 1) C 15 - O 16 | /395. BD*( 1) C 13 - C 15 | 0.65  | 1.46 | 0.028 |
| 31. BD ( 1) C 15 - O 16 | /400. BD*( 1) C 17 - F 18 | 1.43  | 1.16 | 0.037 |
| 32. BD ( 1) O 16 - C 17 | /256. RY*( 2) C 15        | 2.50  | 2.43 | 0.070 |
| 32. BD ( 1) O 16 - C 17 | /391. BD*( 1) C 12 - C 15 | 1.67  | 1.50 | 0.045 |
| 33. BD ( 1) C 17 - F 18 | /283. RY*( 3) C 17        | 0.63  | 2.11 | 0.033 |
| 33. BD ( 1) C 17 - F 18 | /398. BD*( 1) C 15 - O 16 | 2.33  | 1.35 | 0.050 |
| 34. BD ( 1) C 17 - F 19 | /282. RY*( 2) C 17        | 0.66  | 2.06 | 0.033 |
| 34. BD ( 1) C 17 - F 19 | /398. BD*( 1) C 15 - O 16 | 0.63  | 1.32 | 0.026 |
| 34. BD ( 1) C 17 - F 19 | /402. BD*( 1) C 17 - F 20 | 0.70  | 1.25 | 0.027 |
| 35. BD ( 1) C 17 - F 20 | /282. RY*( 2) C 17        | 0.61  | 2.06 | 0.032 |
| 35. BD ( 1) C 17 - F 20 | /398. BD*( 1) C 15 - O 16 | 0.58  | 1.33 | 0.025 |
| 35. BD ( 1) C 17 - F 20 | /401. BD*( 1) C 17 - F 19 | 0.69  | 1.25 | 0.027 |



|                 |                          |      |       |       |
|-----------------|--------------------------|------|-------|-------|
| 36. CR ( 1) C 1 | / 87. RY*( 2) C 2        | 1.39 | 11.12 | 0.111 |
| 36. CR ( 1) C 1 | /139. RY*( 2) C 6        | 0.87 | 11.51 | 0.089 |
| 36. CR ( 1) C 1 | /142. RY*( 5) C 6        | 0.59 | 11.19 | 0.072 |
| 36. CR ( 1) C 1 | /335. RY*( 3) H 21       | 0.63 | 12.08 | 0.078 |
| 36. CR ( 1) C 1 | /372. BD*( 1) C 2 - N 3  | 0.68 | 10.59 | 0.076 |
| 36. CR ( 1) C 1 | /379. BD*( 1) C 5 - C 6  | 0.71 | 10.62 | 0.078 |
| 37. CR ( 1) C 2 | / 74. RY*( 2) C 1        | 1.41 | 11.59 | 0.114 |
| 37. CR ( 1) C 2 | /100. RY*( 2) N 3        | 0.84 | 11.44 | 0.088 |
| 37. CR ( 1) C 2 | /369. BD*( 1) C 1 - C 6  | 0.87 | 10.63 | 0.086 |
| 37. CR ( 1) C 2 | /375. BD*( 1) N 3 - C 4  | 1.51 | 10.62 | 0.114 |
| 38. CR ( 1) N 3 | / 86. RY*( 1) C 2        | 1.67 | 15.33 | 0.143 |
| 38. CR ( 1) N 3 | / 87. RY*( 2) C 2        | 0.52 | 15.19 | 0.079 |
| 38. CR ( 1) N 3 | / 91. RY*( 6) C 2        | 0.56 | 15.14 | 0.082 |
| 38. CR ( 1) N 3 | /112. RY*( 1) C 4        | 1.76 | 15.15 | 0.146 |
| 38. CR ( 1) N 3 | /113. RY*( 2) C 4        | 0.87 | 15.58 | 0.104 |
| 38. CR ( 1) N 3 | /117. RY*( 6) C 4        | 0.62 | 16.81 | 0.091 |
| 38. CR ( 1) N 3 | /368. BD*( 1) C 1 - C 2  | 0.81 | 14.67 | 0.098 |
| 38. CR ( 1) N 3 | /376. BD*( 1) C 4 - C 5  | 0.91 | 14.64 | 0.104 |
| 38. CR ( 1) N 3 | /378. BD*( 1) C 4 - N 7  | 0.85 | 14.57 | 0.100 |
| 39. CR ( 1) C 4 | /100. RY*( 2) N 3        | 0.72 | 11.47 | 0.081 |
| 39. CR ( 1) C 4 | /125. RY*( 1) C 5        | 1.25 | 11.68 | 0.108 |
| 39. CR ( 1) C 4 | /372. BD*( 1) C 2 - N 3  | 1.38 | 10.65 | 0.109 |
| 39. CR ( 1) C 4 | /376. BD*( 1) C 4 - C 5  | 0.67 | 10.63 | 0.076 |
| 39. CR ( 1) C 4 | /379. BD*( 1) C 5 - C 6  | 1.16 | 10.67 | 0.100 |
| 39. CR ( 1) C 4 | /382. BD*( 1) N 7 - C 8  | 0.96 | 10.68 | 0.091 |
| 40. CR ( 1) C 5 | /112. RY*( 1) C 4        | 1.44 | 11.15 | 0.113 |
| 40. CR ( 1) C 5 | /114. RY*( 3) C 4        | 0.58 | 11.93 | 0.074 |
| 40. CR ( 1) C 5 | /139. RY*( 2) C 6        | 1.58 | 11.57 | 0.121 |
| 40. CR ( 1) C 5 | /369. BD*( 1) C 1 - C 6  | 0.56 | 10.67 | 0.069 |
| 40. CR ( 1) C 5 | /375. BD*( 1) N 3 - C 4  | 0.85 | 10.66 | 0.086 |
| 40. CR ( 1) C 5 | /376. BD*( 1) C 4 - C 5  | 0.98 | 10.64 | 0.092 |
| 40. CR ( 1) C 5 | /379. BD*( 1) C 5 - C 6  | 0.76 | 10.68 | 0.081 |
| 40. CR ( 1) C 5 | /380. BD*( 1) C 5 - O 9  | 0.88 | 10.45 | 0.086 |
| 40. CR ( 1) C 5 | /381. BD*( 1) C 6 - H 23 | 0.57 | 10.54 | 0.069 |
| 40. CR ( 1) C 5 | /384. BD*( 1) C 8 - O 9  | 1.22 | 10.42 | 0.102 |
| 41. CR ( 1) C 6 | / 74. RY*( 2) C 1        | 1.30 | 11.57 | 0.109 |
| 41. CR ( 1) C 6 | / 76. RY*( 4) C 1        | 0.56 | 11.06 | 0.071 |
| 41. CR ( 1) C 6 | /128. RY*( 4) C 5        | 1.73 | 11.91 | 0.128 |
| 41. CR ( 1) C 6 | /131. RY*( 7) C 5        | 0.53 | 12.12 | 0.071 |
| 41. CR ( 1) C 6 | /344. RY*( 2) H 23       | 0.59 | 12.32 | 0.076 |
| 41. CR ( 1) C 6 | /368. BD*( 1) C 1 - C 2  | 0.76 | 10.61 | 0.080 |
| 41. CR ( 1) C 6 | /376. BD*( 1) C 4 - C 5  | 0.95 | 10.58 | 0.091 |
| 41. CR ( 1) C 6 | /380. BD*( 1) C 5 - O 9  | 1.54 | 10.40 | 0.114 |
| 42. CR ( 1) N 7 | /112. RY*( 1) C 4        | 0.93 | 15.15 | 0.106 |
| 42. CR ( 1) N 7 | /113. RY*( 2) C 4        | 0.67 | 15.58 | 0.091 |
| 42. CR ( 1) N 7 | /164. RY*( 1) C 8        | 3.52 | 15.31 | 0.208 |
| 42. CR ( 1) N 7 | /375. BD*( 1) N 3 - C 4  | 0.75 | 14.66 | 0.094 |
| 42. CR ( 1) N 7 | /385. BD*( 1) C 8 - C 10 | 1.38 | 14.59 | 0.128 |
| 43. CR ( 1) C 8 | /152. RY*( 2) N 7        | 0.67 | 11.57 | 0.079 |
| 43. CR ( 1) C 8 | /190. RY*( 1) C 10       | 0.89 | 11.90 | 0.092 |
| 43. CR ( 1) C 8 | /194. RY*( 5) C 10       | 0.64 | 11.66 | 0.077 |
| 43. CR ( 1) C 8 | /378. BD*( 1) C 4 - N 7  | 1.21 | 10.61 | 0.102 |

|                  |                           |                  |
|------------------|---------------------------|------------------|
| 43. CR ( 1) C 8  | /380. BD*( 1) C 5 - O 9   | 1.20 10.50 0.101 |
| 43. CR ( 1) C 8  | /384. BD*( 1) C 8 - O 9   | 0.87 10.46 0.087 |
| 43. CR ( 1) C 8  | /386. BD*( 1) C 10 - C 11 | 0.83 10.71 0.085 |
| 43. CR ( 1) C 8  | /387. BD*( 1) C 10 - C 14 | 0.70 10.71 0.078 |
| 44. CR ( 1) O 9  | /126. RY*( 2) C 5         | 1.97 20.29 0.179 |
| 44. CR ( 1) O 9  | /164. RY*( 1) C 8         | 1.56 20.18 0.159 |
| 44. CR ( 1) O 9  | /165. RY*( 2) C 8         | 0.77 20.38 0.112 |
| 44. CR ( 1) O 9  | /379. BD*( 1) C 5 - C 6   | 0.68 19.55 0.103 |
| 45. CR ( 1) C 10 | /169. RY*( 6) C 8         | 1.63 11.50 0.122 |
| 45. CR ( 1) C 10 | /204. RY*( 2) C 11        | 1.51 11.31 0.117 |
| 45. CR ( 1) C 10 | /243. RY*( 2) C 14        | 1.48 11.30 0.115 |
| 45. CR ( 1) C 10 | /382. BD*( 1) N 7 - C 8   | 0.85 10.63 0.085 |
| 45. CR ( 1) C 10 | /388. BD*( 1) C 11 - C 12 | 0.77 10.64 0.081 |
| 45. CR ( 1) C 10 | /393. BD*( 1) C 13 - C 14 | 0.80 10.64 0.083 |
| 46. CR ( 1) C 11 | /190. RY*( 1) C 10        | 0.68 11.80 0.080 |
| 46. CR ( 1) C 11 | /191. RY*( 2) C 10        | 1.40 11.68 0.114 |
| 46. CR ( 1) C 11 | /216. RY*( 1) C 12        | 0.50 11.44 0.068 |
| 46. CR ( 1) C 11 | /217. RY*( 2) C 12        | 0.92 11.45 0.092 |
| 46. CR ( 1) C 11 | /220. RY*( 5) C 12        | 0.50 11.12 0.067 |
| 46. CR ( 1) C 11 | /349. RY*( 2) H 24        | 0.51 12.36 0.071 |
| 46. CR ( 1) C 11 | /385. BD*( 1) C 8 - C 10  | 1.03 10.52 0.094 |
| 46. CR ( 1) C 11 | /387. BD*( 1) C 10 - C 14 | 0.96 10.61 0.091 |
| 46. CR ( 1) C 11 | /391. BD*( 1) C 12 - C 15 | 0.91 10.60 0.088 |
| 47. CR ( 1) C 12 | /204. RY*( 2) C 11        | 0.68 11.30 0.078 |
| 47. CR ( 1) C 12 | /207. RY*( 5) C 11        | 0.85 11.54 0.089 |
| 47. CR ( 1) C 12 | /256. RY*( 2) C 15        | 2.01 11.52 0.136 |
| 47. CR ( 1) C 12 | /354. RY*( 2) H 25        | 0.55 12.35 0.073 |
| 47. CR ( 1) C 12 | /386. BD*( 1) C 10 - C 11 | 0.98 10.60 0.092 |
| 47. CR ( 1) C 12 | /395. BD*( 1) C 13 - C 15 | 1.22 10.59 0.102 |
| 47. CR ( 1) C 12 | /398. BD*( 1) C 15 - O 16 | 0.57 10.34 0.069 |
| 48. CR ( 1) C 13 | /243. RY*( 2) C 14        | 0.86 11.29 0.088 |
| 48. CR ( 1) C 13 | /246. RY*( 5) C 14        | 0.56 11.38 0.071 |
| 48. CR ( 1) C 13 | /255. RY*( 1) C 15        | 0.97 11.43 0.094 |
| 48. CR ( 1) C 13 | /256. RY*( 2) C 15        | 1.54 11.52 0.119 |
| 48. CR ( 1) C 13 | /387. BD*( 1) C 10 - C 14 | 0.98 10.61 0.092 |
| 48. CR ( 1) C 13 | /391. BD*( 1) C 12 - C 15 | 1.04 10.60 0.094 |
| 48. CR ( 1) C 13 | /398. BD*( 1) C 15 - O 16 | 0.92 10.34 0.088 |
| 49. CR ( 1) C 14 | /190. RY*( 1) C 10        | 0.53 11.80 0.071 |
| 49. CR ( 1) C 14 | /191. RY*( 2) C 10        | 1.53 11.68 0.119 |
| 49. CR ( 1) C 14 | /230. RY*( 2) C 13        | 0.95 11.45 0.093 |
| 49. CR ( 1) C 14 | /232. RY*( 4) C 13        | 0.67 11.13 0.077 |
| 49. CR ( 1) C 14 | /385. BD*( 1) C 8 - C 10  | 0.95 10.52 0.090 |
| 49. CR ( 1) C 14 | /386. BD*( 1) C 10 - C 11 | 1.01 10.60 0.093 |
| 49. CR ( 1) C 14 | /395. BD*( 1) C 13 - C 15 | 0.97 10.60 0.091 |
| 50. CR ( 1) C 15 | /217. RY*( 2) C 12        | 1.57 11.54 0.120 |
| 50. CR ( 1) C 15 | /230. RY*( 2) C 13        | 1.44 11.54 0.115 |
| 50. CR ( 1) C 15 | /388. BD*( 1) C 11 - C 12 | 0.78 10.71 0.082 |
| 50. CR ( 1) C 15 | /391. BD*( 1) C 12 - C 15 | 0.94 10.69 0.090 |
| 50. CR ( 1) C 15 | /393. BD*( 1) C 13 - C 14 | 0.69 10.71 0.077 |
| 50. CR ( 1) C 15 | /395. BD*( 1) C 13 - C 15 | 0.72 10.68 0.079 |
| 50. CR ( 1) C 15 | /398. BD*( 1) C 15 - O 16 | 1.30 10.43 0.105 |
| 50. CR ( 1) C 15 | /399. BD*( 1) O 16 - C 17 | 1.02 10.44 0.094 |

|                  |                           |       |       |       |
|------------------|---------------------------|-------|-------|-------|
| 51. CR ( 1) O 16 | /255. RY*( 1) C 15        | 1.64  | 20.38 | 0.164 |
| 51. CR ( 1) O 16 | /281. RY*( 1) C 17        | 1.52  | 20.01 | 0.156 |
| 51. CR ( 1) O 16 | /283. RY*( 3) C 17        | 0.95  | 20.05 | 0.124 |
| 51. CR ( 1) O 16 | /289. RY*( 9) C 17        | 0.88  | 21.40 | 0.122 |
| 51. CR ( 1) O 16 | /395. BD*( 1) C 13 - C 15 | 0.56  | 19.55 | 0.094 |
| 52. CR ( 1) C 17 | /398. BD*( 1) C 15 - O 16 | 1.67  | 10.70 | 0.120 |
| 53. CR ( 1) F 18 | /281. RY*( 1) C 17        | 0.88  | 25.47 | 0.134 |
| 53. CR ( 1) F 18 | /283. RY*( 3) C 17        | 2.49  | 25.52 | 0.226 |
| 54. CR ( 1) F 19 | /281. RY*( 1) C 17        | 0.98  | 25.48 | 0.142 |
| 54. CR ( 1) F 19 | /282. RY*( 2) C 17        | 1.85  | 25.49 | 0.195 |
| 55. CR ( 1) F 20 | /281. RY*( 1) C 17        | 1.13  | 25.47 | 0.152 |
| 55. CR ( 1) F 20 | /282. RY*( 2) C 17        | 1.80  | 25.49 | 0.192 |
| 56. LP ( 1) N 3  | / 86. RY*( 1) C 2         | 3.02  | 1.54  | 0.062 |
| 56. LP ( 1) N 3  | /107. RY*( 9) N 3         | 0.54  | 3.05  | 0.037 |
| 56. LP ( 1) N 3  | /112. RY*( 1) C 4         | 2.14  | 1.37  | 0.049 |
| 56. LP ( 1) N 3  | /113. RY*( 2) C 4         | 1.81  | 1.79  | 0.052 |
| 56. LP ( 1) N 3  | /368. BD*( 1) C 1 - C 2   | 9.33  | 0.89  | 0.083 |
| 56. LP ( 1) N 3  | /374. BD*( 1) C 2 - H 22  | 4.34  | 0.78  | 0.053 |
| 56. LP ( 1) N 3  | /376. BD*( 1) C 4 - C 5   | 11.08 | 0.86  | 0.088 |
| 56. LP ( 1) N 3  | /378. BD*( 1) C 4 - N 7   | 3.06  | 0.79  | 0.044 |
| 56. LP ( 1) N 3  | /380. BD*( 1) C 5 - O 9   | 0.50  | 0.68  | 0.017 |
| 57. LP ( 1) N 7  | /112. RY*( 1) C 4         | 1.04  | 1.40  | 0.035 |
| 57. LP ( 1) N 7  | /113. RY*( 2) C 4         | 0.99  | 1.83  | 0.039 |
| 57. LP ( 1) N 7  | /114. RY*( 3) C 4         | 1.00  | 2.18  | 0.043 |
| 57. LP ( 1) N 7  | /164. RY*( 1) C 8         | 5.15  | 1.56  | 0.082 |
| 57. LP ( 1) N 7  | /165. RY*( 2) C 8         | 0.96  | 1.76  | 0.038 |
| 57. LP ( 1) N 7  | /375. BD*( 1) N 3 - C 4   | 1.39  | 0.91  | 0.032 |
| 57. LP ( 1) N 7  | /376. BD*( 1) C 4 - C 5   | 5.82  | 0.89  | 0.065 |
| 57. LP ( 1) N 7  | /384. BD*( 1) C 8 - O 9   | 13.96 | 0.67  | 0.087 |
| 57. LP ( 1) N 7  | /385. BD*( 1) C 8 - C 10  | 0.80  | 0.84  | 0.023 |
| 58. LP ( 1) O 9  | /126. RY*( 2) C 5         | 3.18  | 1.90  | 0.070 |
| 58. LP ( 1) O 9  | /164. RY*( 1) C 8         | 1.55  | 1.79  | 0.047 |
| 58. LP ( 1) O 9  | /165. RY*( 2) C 8         | 2.10  | 2.00  | 0.058 |
| 58. LP ( 1) O 9  | /376. BD*( 1) C 4 - C 5   | 3.62  | 1.12  | 0.057 |
| 58. LP ( 1) O 9  | /382. BD*( 1) N 7 - C 8   | 4.28  | 1.17  | 0.063 |
| 59. LP ( 2) O 9  | /127. RY*( 3) C 5         | 2.66  | 1.80  | 0.066 |
| 59. LP ( 2) O 9  | /166. RY*( 3) C 8         | 1.44  | 1.93  | 0.051 |
| 59. LP ( 2) O 9  | /167. RY*( 4) C 8         | 0.59  | 0.92  | 0.022 |
| 59. LP ( 2) O 9  | /168. RY*( 5) C 8         | 0.60  | 1.85  | 0.032 |
| 59. LP ( 2) O 9  | /377. BD*( 2) C 4 - C 5   | 23.46 | 0.36  | 0.086 |
| 59. LP ( 2) O 9  | /383. BD*( 2) N 7 - C 8   | 32.35 | 0.36  | 0.097 |
| 60. LP ( 1) C 10 | /168. RY*( 5) C 8         | 1.44  | 1.63  | 0.059 |
| 60. LP ( 1) C 10 | /192. RY*( 3) C 10        | 2.07  | 0.76  | 0.049 |
| 60. LP ( 1) C 10 | /205. RY*( 3) C 11        | 3.13  | 0.90  | 0.065 |
| 60. LP ( 1) C 10 | /244. RY*( 3) C 14        | 2.99  | 0.97  | 0.066 |
| 60. LP ( 1) C 10 | /383. BD*( 2) N 7 - C 8   | 66.75 | 0.13  | 0.101 |
| 60. LP ( 1) C 10 | /389. BD*( 2) C 11 - C 12 | 68.73 | 0.14  | 0.107 |
| 60. LP ( 1) C 10 | /394. BD*( 2) C 13 - C 14 | 69.57 | 0.14  | 0.108 |
| 61. LP*( 1) C 15 | / 60. LP ( 1) C 10        | 0.53  | 0.02  | 0.003 |
| 61. LP*( 1) C 15 | /218. RY*( 3) C 12        | 3.01  | 0.71  | 0.058 |
| 61. LP*( 1) C 15 | /231. RY*( 3) C 13        | 1.91  | 0.74  | 0.047 |
| 61. LP*( 1) C 15 | /233. RY*( 5) C 13        | 0.79  | 1.80  | 0.048 |

|                  |                           |       |      |       |
|------------------|---------------------------|-------|------|-------|
| 61. LP*( 1) C 15 | /259. RY*( 5) C 15        | 1.69  | 0.93 | 0.050 |
| 61. LP*( 1) C 15 | /269. RY*( 2) O 16        | 1.11  | 1.22 | 0.046 |
| 61. LP*( 1) C 15 | /389. BD*( 2) C 11 - C 12 | 54.55 | 0.16 | 0.105 |
| 61. LP*( 1) C 15 | /394. BD*( 2) C 13 - C 14 | 53.86 | 0.17 | 0.104 |
| 62. LP ( 1) O 16 | /255. RY*( 1) C 15        | 1.60  | 1.95 | 0.050 |
| 62. LP ( 1) O 16 | /281. RY*( 1) C 17        | 2.85  | 1.58 | 0.060 |
| 62. LP ( 1) O 16 | /285. RY*( 5) C 17        | 2.01  | 2.26 | 0.061 |
| 62. LP ( 1) O 16 | /289. RY*( 9) C 17        | 1.41  | 2.97 | 0.059 |
| 62. LP ( 1) O 16 | /292. RY*( 12) C 17       | 0.55  | 3.47 | 0.040 |
| 62. LP ( 1) O 16 | /391. BD*( 1) C 12 - C 15 | 0.55  | 1.12 | 0.022 |
| 62. LP ( 1) O 16 | /395. BD*( 1) C 13 - C 15 | 6.28  | 1.12 | 0.075 |
| 62. LP ( 1) O 16 | /400. BD*( 1) C 17 - F 18 | 6.47  | 0.81 | 0.065 |
| 62. LP ( 1) O 16 | /401. BD*( 1) C 17 - F 19 | 2.59  | 0.79 | 0.041 |
| 62. LP ( 1) O 16 | /402. BD*( 1) C 17 - F 20 | 2.36  | 0.79 | 0.039 |
| 63. LP ( 2) O 16 | / 61. LP*( 1) C 15        | 39.38 | 0.22 | 0.109 |
| 63. LP ( 2) O 16 | /257. RY*( 3) C 15        | 1.16  | 1.66 | 0.041 |
| 63. LP ( 2) O 16 | /258. RY*( 4) C 15        | 1.22  | 1.90 | 0.045 |
| 63. LP ( 2) O 16 | /282. RY*( 2) C 17        | 0.81  | 1.39 | 0.031 |
| 63. LP ( 2) O 16 | /284. RY*( 4) C 17        | 2.09  | 1.96 | 0.059 |
| 63. LP ( 2) O 16 | /401. BD*( 1) C 17 - F 19 | 14.19 | 0.57 | 0.081 |
| 63. LP ( 2) O 16 | /402. BD*( 1) C 17 - F 20 | 13.35 | 0.58 | 0.079 |
| 64. LP ( 1) F 18 | /281. RY*( 1) C 17        | 2.43  | 2.09 | 0.064 |
| 64. LP ( 1) F 18 | /283. RY*( 3) C 17        | 6.43  | 2.14 | 0.105 |
| 64. LP ( 1) F 18 | /286. RY*( 6) C 17        | 1.66  | 3.45 | 0.068 |
| 64. LP ( 1) F 18 | /288. RY*( 8) C 17        | 1.44  | 2.92 | 0.058 |
| 65. LP ( 2) F 18 | /281. RY*( 1) C 17        | 1.00  | 1.45 | 0.034 |
| 65. LP ( 2) F 18 | /283. RY*( 3) C 17        | 0.79  | 1.50 | 0.031 |
| 65. LP ( 2) F 18 | /285. RY*( 5) C 17        | 1.58  | 2.13 | 0.053 |
| 65. LP ( 2) F 18 | /398. BD*( 1) C 15 - O 16 | 0.78  | 0.74 | 0.021 |
| 65. LP ( 2) F 18 | /399. BD*( 1) O 16 - C 17 | 10.97 | 0.75 | 0.081 |
| 65. LP ( 2) F 18 | /401. BD*( 1) C 17 - F 19 | 4.63  | 0.66 | 0.050 |
| 65. LP ( 2) F 18 | /402. BD*( 1) C 17 - F 20 | 3.70  | 0.66 | 0.045 |
| 66. LP ( 3) F 18 | /282. RY*( 2) C 17        | 1.79  | 1.47 | 0.046 |
| 66. LP ( 3) F 18 | /284. RY*( 4) C 17        | 1.65  | 2.04 | 0.052 |
| 66. LP ( 3) F 18 | /401. BD*( 1) C 17 - F 19 | 10.65 | 0.66 | 0.076 |
| 66. LP ( 3) F 18 | /402. BD*( 1) C 17 - F 20 | 11.63 | 0.66 | 0.079 |
| 67. LP ( 1) F 19 | /281. RY*( 1) C 17        | 2.75  | 2.10 | 0.068 |
| 67. LP ( 1) F 19 | /282. RY*( 2) C 17        | 4.27  | 2.12 | 0.085 |
| 67. LP ( 1) F 19 | /286. RY*( 6) C 17        | 1.07  | 3.46 | 0.054 |
| 67. LP ( 1) F 19 | /287. RY*( 7) C 17        | 1.83  | 3.44 | 0.071 |
| 67. LP ( 1) F 19 | /288. RY*( 8) C 17        | 0.84  | 2.93 | 0.044 |
| 67. LP ( 1) F 19 | /290. RY*( 10) C 17       | 0.65  | 2.90 | 0.039 |
| 68. LP ( 2) F 19 | /281. RY*( 1) C 17        | 0.56  | 1.45 | 0.026 |
| 68. LP ( 2) F 19 | /284. RY*( 4) C 17        | 1.04  | 2.04 | 0.042 |
| 68. LP ( 2) F 19 | /285. RY*( 5) C 17        | 0.55  | 2.13 | 0.031 |
| 68. LP ( 2) F 19 | /399. BD*( 1) O 16 - C 17 | 10.91 | 0.75 | 0.081 |
| 68. LP ( 2) F 19 | /400. BD*( 1) C 17 - F 18 | 2.01  | 0.68 | 0.033 |
| 68. LP ( 2) F 19 | /402. BD*( 1) C 17 - F 20 | 5.74  | 0.66 | 0.056 |
| 69. LP ( 3) F 19 | /281. RY*( 1) C 17        | 0.75  | 1.45 | 0.030 |
| 69. LP ( 3) F 19 | /283. RY*( 3) C 17        | 1.01  | 1.50 | 0.035 |
| 69. LP ( 3) F 19 | /284. RY*( 4) C 17        | 0.57  | 2.04 | 0.031 |
| 69. LP ( 3) F 19 | /285. RY*( 5) C 17        | 0.63  | 2.13 | 0.033 |

|                          |                           |       |      |       |
|--------------------------|---------------------------|-------|------|-------|
| 69. LP ( 3) F 19         | /400. BD*( 1) C 17 - F 18 | 11.78 | 0.68 | 0.081 |
| 69. LP ( 3) F 19         | /402. BD*( 1) C 17 - F 20 | 8.00  | 0.66 | 0.066 |
| 70. LP ( 1) F 20         | /281. RY*( 1) C 17        | 3.16  | 2.10 | 0.073 |
| 70. LP ( 1) F 20         | /282. RY*( 2) C 17        | 4.09  | 2.12 | 0.083 |
| 70. LP ( 1) F 20         | /286. RY*( 6) C 17        | 0.60  | 3.45 | 0.041 |
| 70. LP ( 1) F 20         | /287. RY*( 7) C 17        | 2.20  | 3.44 | 0.078 |
| 70. LP ( 1) F 20         | /288. RY*( 8) C 17        | 0.89  | 2.93 | 0.046 |
| 70. LP ( 1) F 20         | /290. RY*( 10) C 17       | 0.69  | 2.90 | 0.040 |
| 71. LP ( 2) F 20         | /281. RY*( 1) C 17        | 0.61  | 1.45 | 0.027 |
| 71. LP ( 2) F 20         | /284. RY*( 4) C 17        | 0.83  | 2.04 | 0.037 |
| 71. LP ( 2) F 20         | /285. RY*( 5) C 17        | 0.75  | 2.13 | 0.036 |
| 71. LP ( 2) F 20         | /399. BD*( 1) O 16 - C 17 | 10.88 | 0.75 | 0.081 |
| 71. LP ( 2) F 20         | /400. BD*( 1) C 17 - F 18 | 1.52  | 0.68 | 0.029 |
| 71. LP ( 2) F 20         | /401. BD*( 1) C 17 - F 19 | 6.70  | 0.66 | 0.060 |
| 72. LP ( 3) F 20         | /281. RY*( 1) C 17        | 0.63  | 1.45 | 0.027 |
| 72. LP ( 3) F 20         | /283. RY*( 3) C 17        | 0.97  | 1.50 | 0.034 |
| 72. LP ( 3) F 20         | /284. RY*( 4) C 17        | 0.76  | 2.04 | 0.036 |
| 72. LP ( 3) F 20         | /285. RY*( 5) C 17        | 0.51  | 2.13 | 0.030 |
| 72. LP ( 3) F 20         | /399. BD*( 1) O 16 - C 17 | 0.51  | 0.75 | 0.018 |
| 72. LP ( 3) F 20         | /400. BD*( 1) C 17 - F 18 | 12.61 | 0.69 | 0.084 |
| 72. LP ( 3) F 20         | /401. BD*( 1) C 17 - F 19 | 7.38  | 0.66 | 0.063 |
| 370. BD*( 2) C 1 - C 6   | /75. RY*( 3) C 1          | 2.29  | 0.81 | 0.093 |
| 370. BD*( 2) C 1 - C 6   | /89. RY*( 4) C 2          | 0.52  | 0.92 | 0.047 |
| 370. BD*( 2) C 1 - C 6   | /141. RY*( 4) C 6         | 2.50  | 0.53 | 0.079 |
| 373. BD*( 2) C 2 - N 3   | /88. RY*( 3) C 2          | 2.12  | 1.34 | 0.110 |
| 373. BD*( 2) C 2 - N 3   | /101. RY*( 3) N 3         | 1.23  | 0.80 | 0.065 |
| 377. BD*( 2) C 4 - C 5   | /101. RY*( 3) N 3         | 0.62  | 0.79 | 0.042 |
| 377. BD*( 2) C 4 - C 5   | /118. RY*( 7) C 4         | 1.39  | 1.21 | 0.078 |
| 377. BD*( 2) C 4 - C 5   | /130. RY*( 6) C 5         | 1.15  | 1.39 | 0.076 |
| 377. BD*( 2) C 4 - C 5   | /141. RY*( 4) C 6         | 0.68  | 0.53 | 0.036 |
| 377. BD*( 2) C 4 - C 5   | /153. RY*( 3) N 7         | 0.56  | 0.86 | 0.042 |
| 383. BD*( 2) N 7 - C 8   | /153. RY*( 3) N 7         | 0.75  | 0.87 | 0.059 |
| 383. BD*( 2) N 7 - C 8   | /166. RY*( 3) C 8         | 1.11  | 1.58 | 0.096 |
| 383. BD*( 2) N 7 - C 8   | /167. RY*( 4) C 8         | 1.61  | 0.57 | 0.070 |
| 383. BD*( 2) N 7 - C 8   | /394. BD*( 2) C 13 - C 14 | 0.87  | 0.01 | 0.006 |
| 389. BD*( 2) C 11 - C 12 | /205. RY*( 3) C 11        | 0.65  | 0.76 | 0.051 |
| 389. BD*( 2) C 11 - C 12 | /206. RY*( 4) C 11        | 0.93  | 1.43 | 0.083 |
| 389. BD*( 2) C 11 - C 12 | /218. RY*( 3) C 12        | 2.16  | 0.54 | 0.078 |
| 394. BD*( 2) C 13 - C 14 | /231. RY*( 3) C 13        | 2.48  | 0.57 | 0.086 |
| 394. BD*( 2) C 13 - C 14 | /245. RY*( 4) C 14        | 0.70  | 1.36 | 0.071 |
| 401. BD*( 1) C 17 - F 19 | /282. RY*( 2) C 17        | 1.31  | 0.81 | 0.110 |
| 401. BD*( 1) C 17 - F 19 | /286. RY*( 6) C 17        | 0.83  | 2.15 | 0.149 |
| 401. BD*( 1) C 17 - F 19 | /287. RY*( 7) C 17        | 1.66  | 2.13 | 0.210 |
| 401. BD*( 1) C 17 - F 19 | /291. RY*( 11) C 17       | 0.58  | 8.56 | 0.253 |
| 401. BD*( 1) C 17 - F 19 | /313. RY*( 7) F 19        | 0.53  | 3.77 | 0.161 |
| 402. BD*( 1) C 17 - F 20 | /282. RY*( 2) C 17        | 1.20  | 0.81 | 0.107 |
| 402. BD*( 1) C 17 - F 20 | /287. RY*( 7) C 17        | 1.97  | 2.13 | 0.233 |
| 402. BD*( 1) C 17 - F 20 | /291. RY*( 11) C 17       | 0.58  | 8.56 | 0.258 |

**(Occupancy) Bond orbital/ Coefficients/ Hybrids of P7**

1. (1.98537) BD ( 1) C 1 - C 2  
( 50.97%) 0.7139\* C 1 s( 35.68%)p 1.80( 64.27%)d 0.00( 0.05%)  
0.0000 0.5972 0.0119 0.0005 -0.0791  
-0.0392 0.0000 -0.7963 0.0230 0.0022  
-0.0142 -0.0004 0.0000 0.0075 0.0002  
0.0008 -0.0165 -0.0126  
( 49.03%) 0.7002\* C 2 s( 39.01%)p 1.56( 60.95%)d 0.00( 0.04%)  
0.0001 0.6244 0.0114 -0.0001 0.0829  
-0.0420 0.0015 0.7750 -0.0056 -0.0020  
0.0139 -0.0009 0.0000 0.0013 0.0000  
0.0006 -0.0185 -0.0099
2. (1.97239) BD ( 1) C 1 - C 6  
( 49.06%) 0.7004\* C 1 s( 35.62%)p 1.81( 64.33%)d 0.00( 0.05%)  
0.0002 0.5967 0.0125 0.0006 -0.6187  
-0.0128 0.0004 0.5085 -0.0410 -0.0005  
-0.0041 -0.0009 0.0000 -0.0159 0.0003  
-0.0001 0.0072 -0.0125  
( 50.94%) 0.7137\* C 6 s( 35.96%)p 1.78( 64.00%)d 0.00( 0.04%)  
-0.0001 0.5995 0.0156 -0.0003 0.6642  
-0.0324 0.0008 -0.4439 -0.0260 0.0023  
0.0062 -0.0010 0.0001 -0.0170 0.0001  
0.0000 -0.0003 -0.0109
3. (1.67612) BD ( 2) C 1 - C 6  
( 51.39%) 0.7169\* C 1 s( 0.00%)p 1.00( 99.95%)d 0.00( 0.05%)  
0.0000 0.0000 0.0000 0.0000 -0.0197  
-0.0002 0.0000 -0.0159 -0.0002 0.0000  
0.9994 0.0100 -0.0002 0.0004 -0.0221  
-0.0001 0.0004 -0.0008  
( 48.61%) 0.6972\* C 6 s( 0.00%)p 1.00( 99.94%)d 0.00( 0.06%)  
0.0000 0.0000 0.0000 0.0000 -0.0198  
-0.0002 -0.0001 -0.0158 -0.0001 -0.0001  
0.9993 0.0093 0.0058 0.0004 0.0072  
-0.0243 -0.0005 -0.0004
4. (1.97809) BD ( 1) C 1 - H 21  
( 60.56%) 0.7782\* C 1 s( 28.66%)p 2.49( 71.29%)d 0.00( 0.05%)  
-0.0004 0.5350 -0.0204 -0.0010 0.7799  
0.0138 0.0026 0.3226 0.0067 0.0013  
0.0205 0.0004 0.0001 0.0135 0.0008  
0.0003 0.0136 -0.0094  
( 39.44%) 0.6280\* H 21 s( 99.95%)p 0.00( 0.05%)  
0.9998 -0.0003 0.0007 -0.0200 -0.0083  
-0.0005
5. (1.98321) BD ( 1) C 2 - N 3  
( 40.37%) 0.6354\* C 2 s( 32.15%)p 2.11( 67.75%)d 0.00( 0.10%)  
0.0001 0.5664 0.0272 0.0002 -0.7277  
0.0145 0.0048 -0.3771 0.0711 0.0007  
-0.0202 0.0014 0.0001 0.0197 0.0012  
0.0006 0.0170 -0.0165  
( 59.63%) 0.7722\* N 3 s( 35.48%)p 1.82( 64.43%)d 0.00( 0.09%)  
-0.0002 0.5956 0.0106 -0.0004 0.7329  
0.0287 0.0017 0.3250 -0.0189 -0.0018

0.0195 0.0003 0.0000 0.0262 0.0009  
 0.0009 0.0023 -0.0144

6. (1.73789) BD ( 2) C 2 - N 3  
 ( 41.93%) 0.6475\* C 2 s( 0.00%)p 1.00( 99.86%)d 0.00( 0.14%)  
 0.0000 0.0000 0.0000 0.0000 -0.0196  
 -0.0002 -0.0001 -0.0159 -0.0002 -0.0001  
 0.9989 0.0115 0.0035 0.0007 -0.0373  
 -0.0032 0.0007 -0.0014  
 ( 58.07%) 0.7621\* N 3 s( 0.00%)p 1.00( 99.84%)d 0.00( 0.16%)  
 0.0000 0.0000 0.0000 0.0000 -0.0196  
 -0.0002 0.0001 -0.0158 -0.0002 0.0001  
 0.9988 0.0106 -0.0044 -0.0009 0.0099  
 0.0388 0.0004 0.0014

7. (1.98042) BD ( 1) C 2 - H 22  
 ( 59.69%) 0.7726\* C 2 s( 28.84%)p 2.47( 71.11%)d 0.00( 0.06%)  
 -0.0006 0.5362 -0.0288 -0.0001 0.6766  
 0.0251 0.0025 -0.5027 -0.0043 -0.0019  
 0.0053 0.0004 0.0000 -0.0203 0.0002  
 -0.0002 0.0067 -0.0102  
 ( 40.31%) 0.6349\* H 22 s( 99.95%)p 0.00( 0.05%)  
 0.9997 0.0017 0.0017 -0.0163 0.0158  
 -0.0001

8. (1.98440) BD ( 1) N 3 - C 4  
 ( 58.15%) 0.7626\* N 3 s( 35.53%)p 1.81( 64.37%)d 0.00( 0.09%)  
 -0.0001 0.5961 0.0066 -0.0003 -0.6751  
 -0.0216 -0.0030 0.4328 -0.0129 -0.0011  
 -0.0064 -0.0006 -0.0001 -0.0267 0.0000  
 -0.0001 -0.0030 -0.0146  
 ( 41.85%) 0.6469\* C 4 s( 34.49%)p 1.90( 65.44%)d 0.00( 0.07%)  
 -0.0001 0.5868 0.0238 0.0008 0.6178  
 0.0095 -0.0062 -0.5193 0.0542 0.0035  
 0.0040 0.0010 -0.0001 -0.0214 0.0003  
 -0.0001 0.0066 -0.0145

9. (1.98167) BD ( 1) C 4 - C 5  
 ( 48.87%) 0.6991\* C 4 s( 35.57%)p 1.81( 64.37%)d 0.00( 0.05%)  
 0.0001 0.5959 -0.0242 -0.0004 0.1024  
 -0.0035 0.0019 0.7955 0.0135 0.0022  
 0.0145 0.0001 0.0001 0.0007 -0.0001  
 0.0006 -0.0211 -0.0098  
 ( 51.13%) 0.7151\* C 5 s( 34.77%)p 1.87( 65.18%)d 0.00( 0.05%)  
 0.0000 0.5893 -0.0215 -0.0003 -0.0249  
 -0.0088 0.0049 -0.8067 -0.0079 -0.0016  
 -0.0132 -0.0003 0.0001 0.0055 0.0001  
 0.0007 -0.0184 -0.0109

10. (1.56697) BD ( 2) C 4 - C 5  
 ( 47.76%) 0.6911\* C 4 s( 0.00%)p 1.00( 99.97%)d 0.00( 0.03%)  
 0.0000 0.0000 0.0000 0.0000 -0.0197  
 -0.0003 -0.0002 -0.0157 -0.0003 -0.0002  
 0.9993 0.0180 0.0102 -0.0004 0.0047  
 0.0176 0.0002 0.0006  
 ( 52.24%) 0.7228\* C 5 s( 0.00%)p 1.00( 99.97%)d 0.00( 0.03%)  
 0.0000 0.0000 0.0000 0.0000 -0.0199

-0.0003 -0.0002 -0.0157 -0.0002 -0.0002  
 0.9994 0.0145 0.0099 0.0003 0.0020  
 -0.0158 -0.0003 -0.0004

11. (1.97244) BD ( 1) C 4 - N 7  
 ( 41.15%) 0.6415\* C 4 s( 29.48%)p 2.39( 70.43%)d 0.00( 0.09%)  
 -0.0002 0.5428 0.0125 -0.0008 -0.7787  
 -0.0077 0.0084 -0.3064 0.0600 -0.0005  
 -0.0202 0.0008 0.0002 0.0115 0.0012  
 0.0003 0.0220 -0.0164  
 ( 58.85%) 0.7671\* N 7 s( 30.94%)p 2.23( 68.96%)d 0.00( 0.10%)  
 -0.0002 0.5562 0.0034 -0.0004 0.8240  
 -0.0101 -0.0004 0.0977 0.0259 -0.0031  
 0.0180 0.0002 -0.0001 0.0231 0.0012  
 0.0006 0.0146 -0.0151

12. (1.97589) BD ( 1) C 5 - C 6  
 ( 50.83%) 0.7130\* C 5 s( 40.82%)p 1.45( 59.16%)d 0.00( 0.03%)  
 -0.0002 0.6387 0.0140 0.0002 0.6247  
 0.0252 -0.0022 0.4466 -0.0280 -0.0006  
 0.0194 0.0001 -0.0001 0.0124 0.0006  
 0.0004 0.0053 -0.0091  
 ( 49.17%) 0.7012\* C 6 s( 34.48%)p 1.90( 65.46%)d 0.00( 0.05%)  
 0.0001 0.5871 0.0110 0.0011 -0.7425  
 0.0254 -0.0018 -0.3185 -0.0291 -0.0005  
 -0.0197 0.0000 0.0000 0.0160 0.0009  
 0.0005 0.0107 -0.0133

13. (1.98853) BD ( 1) C 5 - O 9  
 ( 31.67%) 0.5627\* C 5 s( 24.16%)p 3.13( 75.61%)d 0.01( 0.24%)  
 -0.0002 0.4907 0.0272 -0.0002 -0.7785  
 0.0164 0.0141 0.3819 -0.0603 -0.0022  
 -0.0095 -0.0006 0.0002 -0.0273 0.0011  
 -0.0003 0.0305 -0.0262  
 ( 68.33%) 0.8266\* O 9 s( 31.69%)p 2.15( 68.24%)d 0.00( 0.07%)  
 -0.0001 0.5629 0.0006 -0.0002 0.8011  
 -0.0064 0.0006 -0.2006 -0.0121 0.0023  
 0.0128 -0.0003 0.0000 -0.0209 0.0004  
 -0.0002 0.0109 -0.0136

14. (1.97963) BD ( 1) C 6 - H 23  
 ( 61.25%) 0.7826\* C 6 s( 29.53%)p 2.39( 70.43%)d 0.00( 0.04%)  
 -0.0003 0.5430 -0.0219 -0.0005 0.0693  
 -0.0037 -0.0002 0.8361 0.0130 -0.0056  
 0.0146 0.0001 -0.0001 0.0014 0.0001  
 0.0006 -0.0172 -0.0114  
 ( 38.75%) 0.6225\* H 23 s( 99.95%)p 0.00( 0.05%)  
 0.9998 0.0002 0.0017 -0.0019 -0.0216  
 -0.0004

15. (1.98505) BD ( 1) N 7 - C 8  
 ( 58.81%) 0.7669\* N 7 s( 36.62%)p 1.73( 63.28%)d 0.00( 0.11%)  
 -0.0001 0.6051 0.0071 -0.0004 -0.4825  
 0.0224 -0.0023 0.6320 -0.0021 0.0007  
 0.0005 0.0004 0.0000 -0.0181 -0.0002  
 0.0004 -0.0224 -0.0152  
 ( 41.19%) 0.6418\* C 8 s( 35.90%)p 1.78( 64.02%)d 0.00( 0.08%)



0.0001 0.5991 0.0089 0.0000 0.3875  
 -0.0144 -0.0043 -0.6984 -0.0453 0.0002  
 -0.0029 -0.0010 -0.0001 -0.0224 0.0000  
 0.0001 -0.0102 -0.0141

16. (1.85604) BD ( 2) N 7 - C 8  
 ( 59.75%) 0.7730\* N 7 s( 0.00%)p 1.00( 99.81%)d 0.00( 0.19%)  
 0.0000 -0.0002 0.0000 0.0000 -0.0198  
 0.0002 0.0001 -0.0157 0.0002 0.0001  
 0.9987 -0.0113 -0.0036 -0.0009 0.0050  
 0.0434 0.0006 0.0013  
 ( 40.25%) 0.6344\* C 8 s( 0.00%)p 1.00( 99.79%)d 0.00( 0.21%)  
 0.0000 -0.0001 0.0000 0.0000 -0.0201  
 0.0002 -0.0003 -0.0153 0.0002 -0.0002  
 0.9985 -0.0089 0.0130 0.0003 0.0296  
 -0.0354 -0.0011 0.0001

17. (1.98845) BD ( 1) C 8 - O 9  
 ( 30.57%) 0.5529\* C 8 s( 24.82%)p 3.02( 74.91%)d 0.01( 0.27%)  
 0.0001 -0.4982 0.0039 0.0019 -0.5025  
 0.0136 0.0058 -0.7025 -0.0489 0.0095  
 -0.0210 -0.0005 0.0003 -0.0432 -0.0013  
 -0.0018 0.0145 0.0259  
 ( 69.43%) 0.8333\* O 9 s( 30.05%)p 2.33( 69.88%)d 0.00( 0.07%)  
 0.0001 -0.5482 0.0043 0.0001 0.5434  
 -0.0071 0.0014 0.6348 0.0034 -0.0025  
 0.0209 -0.0001 0.0000 -0.0166 -0.0004  
 -0.0010 0.0167 0.0134

18. (1.97020) BD ( 1) C 8 - C 10  
 ( 49.42%) 0.7030\* C 8 s( 39.22%)p 1.55( 60.75%)d 0.00( 0.03%)  
 0.0003 -0.6262 0.0066 -0.0003 0.7710  
 -0.0322 -0.0020 -0.1090 0.0021 0.0013  
 0.0138 -0.0006 0.0000 0.0073 -0.0004  
 0.0002 -0.0135 0.0065  
 ( 50.58%) 0.7112\* C 10 s( 30.97%)p 2.23( 68.98%)d 0.00( 0.05%)  
 -0.0001 -0.5565 -0.0025 -0.0007 -0.8241  
 0.0054 0.0004 0.1022 -0.0028 -0.0004  
 -0.0155 0.0000 0.0000 0.0043 -0.0007  
 0.0000 -0.0183 0.0127

19. (1.97256) BD ( 1) C 10 - C 11  
 ( 51.40%) 0.7169\* C 10 s( 34.61%)p 1.89( 65.35%)d 0.00( 0.04%)  
 0.0000 0.5883 -0.0001 -0.0004 -0.3044  
 0.0108 -0.0002 0.7488 0.0071 0.0003  
 0.0032 0.0003 0.0000 -0.0107 0.0000  
 0.0001 -0.0111 -0.0113  
 ( 48.60%) 0.6972\* C 11 s( 35.61%)p 1.81( 64.35%)d 0.00( 0.04%)  
 0.0001 0.5967 0.0036 0.0013 0.3506  
 -0.0222 0.0003 -0.7211 -0.0085 -0.0019  
 -0.0020 -0.0006 0.0000 -0.0111 0.0000  
 0.0001 -0.0116 -0.0115

20. (1.96956) BD ( 1) C 10 - C 14  
 ( 51.54%) 0.7179\* C 10 s( 34.37%)p 1.91( 65.60%)d 0.00( 0.04%)  
 -0.0001 0.5863 -0.0002 -0.0003 -0.4767  
 0.0092 -0.0007 -0.6544 -0.0092 -0.0006

-0.0180 0.0001 0.0000 0.0143 0.0005  
 0.0006 -0.0045 -0.0114  
 ( 48.46%) 0.6961\* C 14 s( 35.49%)p 1.82( 64.47%)d 0.00( 0.04%)  
 0.0002 0.5957 0.0044 0.0013 0.5002  
 -0.0189 0.0008 0.6274 0.0130 0.0021  
 0.0201 -0.0002 0.0001 0.0150 0.0005  
 0.0007 -0.0060 -0.0115

21. (1.97383) BD ( 1) C 11 - C 12  
 ( 49.76%) 0.7054\* C 11 s( 36.06%)p 1.77( 63.90%)d 0.00( 0.04%)  
 0.0001 0.6002 0.0181 0.0005 -0.7900  
 0.0062 -0.0012 0.1129 -0.0427 0.0012  
 -0.0160 -0.0005 0.0000 -0.0003 0.0008  
 0.0000 0.0175 -0.0112  
 ( 50.24%) 0.7088\* C 12 s( 36.59%)p 1.73( 63.37%)d 0.00( 0.04%)  
 0.0000 0.6047 0.0152 0.0005 0.7925  
 -0.0151 0.0008 -0.0606 -0.0399 0.0006  
 0.0115 -0.0009 0.0000 -0.0078 0.0004  
 -0.0001 0.0149 -0.0113

22. (1.67759) BD ( 2) C 11 - C 12  
 ( 47.99%) 0.6927\* C 11 s( 0.00%)p 1.00( 99.95%)d 0.00( 0.05%)  
 0.0000 0.0002 0.0000 -0.0001 -0.0219  
 -0.0002 0.0000 -0.0132 0.0001 0.0000  
 0.9994 0.0035 0.0043 0.0005 -0.0209  
 -0.0088 0.0003 -0.0009  
 ( 52.01%) 0.7212\* C 12 s( 0.00%)p 1.00( 99.95%)d 0.00( 0.05%)  
 0.0000 0.0025 -0.0005 0.0001 -0.0177  
 -0.0002 0.0000 -0.0159 -0.0006 -0.0003  
 0.9994 0.0089 0.0062 0.0001 0.0157  
 -0.0159 -0.0007 0.0000

23. (1.97825) BD ( 1) C 11 - H 24  
 ( 61.17%) 0.7821\* C 11 s( 28.29%)p 2.53( 71.66%)d 0.00( 0.05%)  
 -0.0004 0.5315 -0.0194 -0.0013 0.5003  
 0.0106 -0.0038 0.6825 0.0055 -0.0035  
 0.0199 0.0003 -0.0001 0.0176 0.0006  
 0.0008 -0.0050 -0.0124  
 ( 38.83%) 0.6232\* H 24 s( 99.95%)p 0.00( 0.05%)  
 0.9998 0.0003 0.0014 -0.0131 -0.0175  
 -0.0005

24. (1.97390) BD ( 1) C 12 - C 15  
 ( 49.42%) 0.7030\* C 12 s( 34.94%)p 1.86( 65.01%)d 0.00( 0.05%)  
 0.0002 0.5910 0.0134 0.0004 -0.4990  
 0.0346 -0.0004 -0.6320 -0.0111 0.0002  
 -0.0204 0.0008 0.0000 0.0170 0.0007  
 0.0009 -0.0060 -0.0120  
 ( 50.58%) 0.7112\* C 15 s( 37.69%)p 1.65( 62.27%)d 0.00( 0.04%)  
 -0.0001 0.6139 0.0008 0.0005 0.4371  
 -0.0374 0.0034 0.6556 0.0143 0.0009  
 0.0164 0.0004 0.0003 0.0148 0.0005  
 0.0004 -0.0086 -0.0096

25. (1.97558) BD ( 1) C 12 - H 25  
 ( 61.27%) 0.7828\* C 12 s( 28.45%)p 2.51( 71.50%)d 0.00( 0.04%)  
 -0.0003 0.5328 -0.0241 -0.0007 -0.3471

-0.0105 0.0031 0.7709 0.0089 -0.0049  
 0.0047 -0.0001 0.0000 -0.0138 0.0001  
 0.0002 -0.0101 -0.0125  
 ( 38.73%) 0.6223\* H 25 s( 99.95%)p 0.00( 0.05%)  
 0.9998 0.0003 0.0013 0.0094 -0.0192  
 -0.0001

26. (1.97156) BD ( 1) C 13 - C 14  
 ( 50.55%) 0.7110\* C 13 s( 36.58%)p 1.73( 63.38%)d 0.00( 0.04%)  
 -0.0001 0.6046 0.0156 0.0009 0.7880  
 -0.0057 0.0009 -0.1040 0.0396 -0.0013  
 0.0195 0.0003 0.0000 0.0011 0.0010  
 0.0001 0.0167 -0.0113  
 ( 49.45%) 0.7032\* C 14 s( 35.98%)p 1.78( 63.98%)d 0.00( 0.04%)  
 0.0001 0.5995 0.0201 0.0004 -0.7959  
 0.0157 -0.0013 0.0654 0.0409 -0.0006  
 -0.0140 0.0011 0.0000 -0.0074 0.0006  
 -0.0001 0.0158 -0.0110

27. (1.66929) BD ( 2) C 13 - C 14  
 ( 53.15%) 0.7290\* C 13 s( 0.00%)p 1.00( 99.95%)d 0.00( 0.05%)  
 0.0000 -0.0030 -0.0003 -0.0001 -0.0251  
 -0.0015 -0.0002 -0.0203 -0.0001 -0.0002  
 0.9992 0.0061 0.0047 -0.0005 0.0181  
 0.0125 0.0000 0.0014  
 ( 46.85%) 0.6845\* C 14 s( 0.00%)p 1.00( 99.94%)d 0.00( 0.06%)  
 0.0000 -0.0007 -0.0003 0.0000 -0.0195  
 -0.0002 -0.0001 -0.0158 0.0002 0.0000  
 0.9994 0.0012 0.0038 0.0001 -0.0192  
 0.0140 0.0007 -0.0004

28. (1.97998) BD ( 1) C 13 - C 15  
 ( 49.60%) 0.7043\* C 13 s( 34.67%)p 1.88( 65.28%)d 0.00( 0.05%)  
 0.0000 0.5887 0.0106 0.0007 -0.3564  
 0.0288 -0.0002 0.7245 0.0044 -0.0001  
 0.0076 0.0012 -0.0001 -0.0133 -0.0002  
 0.0006 -0.0121 -0.0124  
 ( 50.40%) 0.7099\* C 15 s( 39.25%)p 1.55( 60.71%)d 0.00( 0.04%)  
 0.0000 0.6264 -0.0099 0.0001 0.2336  
 -0.0141 0.0021 -0.7432 -0.0032 -0.0024  
 -0.0005 -0.0020 0.0000 -0.0093 -0.0001  
 0.0000 -0.0139 -0.0098

29. (1.97561) BD ( 1) C 13 - H 26  
 ( 61.54%) 0.7845\* C 13 s( 28.72%)p 2.48( 71.24%)d 0.00( 0.05%)  
 0.0003 -0.5354 0.0217 0.0014 0.4996  
 0.0138 -0.0024 0.6797 0.0028 -0.0038  
 0.0247 -0.0003 -0.0002 -0.0169 -0.0006  
 -0.0009 0.0040 0.0125  
 ( 38.46%) 0.6202\* H 26 s( 99.95%)p 0.00( 0.05%)  
 -0.9998 -0.0004 -0.0016 -0.0117 -0.0181  
 -0.0012

30. (1.97711) BD ( 1) C 14 - H 27  
 ( 61.70%) 0.7855\* C 14 s( 28.51%)p 2.51( 71.45%)d 0.00( 0.05%)  
 0.0004 -0.5335 0.0211 0.0012 -0.3374  
 -0.0077 0.0035 0.7748 0.0098 -0.0035

0.0053 0.0001 0.0000 0.0139 0.0000  
 -0.0002 0.0117 0.0122  
 ( 38.30%) 0.6189\* H 27 s( 99.95%)p 0.00( 0.05%)  
 -0.9998 -0.0008 -0.0014 0.0102 -0.0195  
 -0.0001

31. (1.98572) BD ( 1) C 15 - O 16  
 ( 30.89%) 0.5558\* C 15 s( 22.83%)p 3.37( 76.94%)d 0.01( 0.24%)  
 0.0000 0.4773 0.0210 -0.0015 -0.8666  
 -0.0201 0.0097 0.1298 0.0293 -0.0057  
 -0.0141 -0.0050 0.0001 -0.0125 0.0010  
 -0.0006 0.0402 -0.0244  
 ( 69.11%) 0.8313\* O 16 s( 34.53%)p 1.89( 65.41%)d 0.00( 0.06%)  
 -0.0002 0.5876 -0.0034 -0.0001 0.7813  
 -0.0032 0.0002 -0.2066 -0.0030 0.0033  
 0.0305 0.0019 -0.0007 -0.0173 0.0030  
 -0.0026 0.0097 -0.0128

32. (1.99354) BD ( 1) O 16 - C 17  
 ( 67.70%) 0.8228\* O 16 s( 28.70%)p 2.48( 71.21%)d 0.00( 0.09%)  
 0.0000 0.5357 0.0014 -0.0004 -0.5687  
 0.0185 -0.0015 -0.6095 -0.0070 0.0014  
 0.1300 -0.0006 -0.0003 0.0219 -0.0043  
 -0.0078 -0.0109 -0.0145  
 ( 32.30%) 0.5683\* C 17 s( 28.75%)p 2.47( 70.96%)d 0.01( 0.29%)  
 0.0001 0.5362 -0.0061 0.0027 0.6173  
 0.0053 0.0002 0.5587 -0.0340 0.0016  
 -0.1232 0.0063 0.0001 0.0440 -0.0101  
 -0.0090 0.0065 -0.0266

33. (1.99465) BD ( 1) C 17 - F 18  
 ( 27.94%) 0.5286\* C 17 s( 23.76%)p 3.19( 75.79%)d 0.02( 0.45%)  
 -0.0003 0.4873 0.0132 -0.0024 -0.7768  
 0.0279 0.0127 0.3915 -0.0129 -0.0089  
 -0.0002 -0.0004 0.0004 -0.0470 0.0003  
 -0.0005 0.0340 -0.0339  
 ( 72.06%) 0.8489\* F 18 s( 26.98%)p 2.70( 72.93%)d 0.00( 0.09%)  
 0.0000 0.5193 -0.0091 -0.0004 0.7611  
 -0.0099 -0.0038 -0.3870 0.0058 0.0020  
 0.0018 -0.0002 0.0000 -0.0215 0.0001  
 -0.0001 0.0155 -0.0152

34. (1.99573) BD ( 1) C 17 - F 19  
 ( 27.50%) 0.5244\* C 17 s( 23.65%)p 3.21( 75.86%)d 0.02( 0.49%)  
 -0.0001 0.4862 -0.0036 -0.0007 -0.0003  
 0.0113 -0.0052 -0.6017 0.0234 0.0072  
 -0.6287 0.0237 0.0088 -0.0009 -0.0003  
 0.0616 -0.0288 0.0177  
 ( 72.50%) 0.8515\* F 19 s( 26.00%)p 2.84( 73.91%)d 0.00( 0.09%)  
 0.0000 0.5098 -0.0087 -0.0003 0.0060  
 0.0007 -0.0002 0.5976 -0.0071 -0.0030  
 0.6180 -0.0076 -0.0032 0.0004 0.0006  
 0.0255 -0.0122 0.0081

35. (1.99596) BD ( 1) C 17 - F 20  
 ( 27.58%) 0.5251\* C 17 s( 23.80%)p 3.18( 75.71%)d 0.02( 0.49%)  
 -0.0001 0.4878 -0.0045 -0.0007 0.0990

0.0082 -0.0074 -0.4060 0.0167 0.0051  
 0.7622 -0.0309 -0.0094 -0.0078 0.0124  
 -0.0511 -0.0114 0.0438  
 ( 72.42%) 0.8510\* F 20 s( 26.18%)p 2.82( 73.73%)d 0.00( 0.09%)  
 0.0000 0.5116 -0.0088 -0.0004 -0.0946  
 0.0021 0.0004 0.4039 -0.0048 -0.0020  
 -0.7517 0.0093 0.0038 -0.0026 0.0047  
 -0.0212 -0.0053 0.0193  
 36. (1.99915) CR ( 1) C 1 s(100.00%)p 0.00( 0.00%)  
 1.0000 0.0001 0.0000 0.0000 0.0004  
 0.0000 0.0000 0.0001 0.0000 0.0000  
 0.0000 0.0000 0.0000 0.0000 0.0000  
 0.0000 0.0000 0.0000  
 37. (1.99918) CR ( 1) C 2 s(100.00%)p 0.00( 0.00%)  
 1.0000 0.0001 0.0000 0.0000 0.0005  
 0.0000 0.0000 -0.0003 0.0000 0.0000  
 0.0000 0.0000 0.0000 0.0000 0.0000  
 0.0000 0.0000 0.0000  
 38. (1.99935) CR ( 1) N 3 s(100.00%)  
 1.0000 0.0002 0.0000 0.0000 0.0001  
 0.0000 0.0000 0.0000 0.0000 0.0000  
 0.0000 0.0000 0.0000 0.0000 0.0000  
 0.0000 0.0000 0.0000  
 39. (1.99888) CR ( 1) C 4 s(100.00%)p 0.00( 0.00%)  
 1.0000 0.0001 0.0000 0.0000 -0.0001  
 0.0000 0.0000 -0.0002 0.0000 0.0000  
 0.0000 0.0000 0.0000 0.0000 0.0000  
 0.0000 0.0000 0.0000  
 40. (1.99867) CR ( 1) C 5 s(100.00%)p 0.00( 0.00%)  
 1.0000 0.0002 0.0000 0.0000 0.0000  
 0.0000 0.0000 0.0002 0.0000 0.0000  
 0.0000 0.0000 0.0000 0.0000 0.0000  
 0.0000 0.0000 0.0000  
 41. (1.99902) CR ( 1) C 6 s(100.00%)p 0.00( 0.00%)  
 1.0000 0.0001 0.0000 0.0000 0.0002  
 0.0000 0.0000 0.0002 0.0000 0.0000  
 0.0000 0.0000 0.0000 0.0000 0.0000  
 0.0000 0.0000 0.0000  
 42. (1.99932) CR ( 1) N 7 s(100.00%)p 0.00( 0.00%)  
 1.0000 0.0002 0.0000 0.0000 0.0001  
 0.0000 0.0000 0.0000 0.0000 0.0000  
 0.0000 0.0000 0.0000 0.0000 0.0000  
 0.0000 0.0000 0.0000  
 43. (1.99901) CR ( 1) C 8 s(100.00%)p 0.00( 0.00%)  
 1.0000 0.0001 0.0000 0.0000 -0.0002  
 0.0000 0.0000 0.0001 0.0000 0.0000  
 0.0000 0.0000 0.0000 0.0000 0.0000  
 0.0000 0.0000 0.0000  
 44. (1.99970) CR ( 1) O 9 s(100.00%)  
 1.0000 0.0002 0.0000 0.0000 -0.0001  
 0.0000 0.0000 0.0001 0.0000 0.0000  
 0.0000 0.0000 0.0000 0.0000 0.0000

0.0000 0.0000 0.0000

45. (1.99890) CR ( 1) C 10 s(100.00%)p 0.00( 0.00%)  
1.0000 -0.0001 0.0000 0.0000 -0.0001  
0.0000 0.0000 -0.0001 0.0000 0.0000  
0.0000 0.0000 0.0000 0.0000 0.0000  
0.0000 0.0000 0.0000

46. (1.99905) CR ( 1) C 11 s(100.00%)p 0.00( 0.00%)  
1.0000 0.0000 0.0000 0.0000 0.0002  
0.0000 0.0000 0.0003 0.0000 0.0000  
0.0000 0.0000 0.0000 0.0000 0.0000  
0.0000 0.0000 0.0000

47. (1.99901) CR ( 1) C 12 s(100.00%)p 0.00( 0.00%)  
1.0000 0.0001 0.0000 0.0000 0.0000  
0.0000 0.0000 0.0004 0.0000 0.0000  
0.0000 0.0000 0.0000 0.0000 0.0000  
0.0000 0.0000 0.0000

48. (1.99899) CR ( 1) C 13 s(100.00%)p 0.00( 0.00%)  
1.0000 0.0002 0.0000 0.0000 -0.0001  
0.0000 0.0000 -0.0002 0.0000 0.0000  
0.0000 0.0000 0.0000 0.0000 0.0000  
0.0000 0.0000 0.0000

49. (1.99905) CR ( 1) C 14 s(100.00%)p 0.00( 0.00%)  
1.0000 0.0000 0.0000 0.0000 0.0001  
0.0000 0.0000 -0.0004 0.0000 0.0000  
0.0000 0.0000 0.0000 0.0000 0.0000  
0.0000 0.0000 0.0000

50. (1.99868) CR ( 1) C 15 s(100.00%)p 0.00( 0.00%)  
1.0000 0.0001 0.0000 0.0000 0.0000  
0.0000 0.0000 0.0001 0.0000 0.0000  
0.0000 0.0000 0.0000 0.0000 0.0000  
0.0000 0.0000 0.0000

51. (1.99963) CR ( 1) O 16 s(100.00%)  
1.0000 0.0002 0.0000 0.0000 0.0001  
0.0000 0.0000 0.0001 0.0000 0.0000  
0.0000 0.0000 0.0000 0.0000 0.0000  
0.0000 0.0000 0.0000

52. (1.99962) CR ( 1) C 17 s(100.00%)p 0.00( 0.00%)  
1.0000 0.0002 0.0000 0.0000 -0.0003  
0.0000 0.0000 0.0000 0.0000 0.0000  
0.0000 0.0000 0.0000 0.0000 0.0000  
0.0000 0.0000 0.0000

53. (1.99991) CR ( 1) F 18 s(100.00%)p 0.00( 0.00%)  
1.0000 0.0002 0.0000 0.0000 -0.0001  
0.0000 0.0000 0.0001 0.0000 0.0000  
0.0000 0.0000 0.0000 0.0000 0.0000  
0.0000 0.0000 0.0000

54. (1.99992) CR ( 1) F 19 s(100.00%)  
1.0000 0.0002 0.0000 0.0000 0.0000  
0.0000 0.0000 -0.0001 0.0000 0.0000  
-0.0001 0.0000 0.0000 0.0000 0.0000  
0.0000 0.0000 0.0000

55. (1.99992) CR ( 1) F 20 s(100.00%)

1.0000 0.0002 0.0000 0.0000 0.0000  
 0.0000 0.0000 0.0000 0.0000 0.0000  
 0.0001 0.0000 0.0000 0.0000 0.0000  
 0.0000 0.0000 0.0000

56. (1.91122) LP ( 1) N 3 s( 28.98%)p 2.45( 70.94%)d 0.00( 0.08%)  
 -0.0001 0.5382 -0.0103 0.0006 -0.0637  
 0.0020 0.0004 -0.8394 0.0242 -0.0021  
 -0.0145 0.0004 0.0000 -0.0030 -0.0001  
 -0.0009 0.0239 0.0151

57. (1.90622) LP ( 1) N 7 s( 32.43%)p 2.08( 67.49%)d 0.00( 0.08%)  
 -0.0001 0.5694 -0.0055 0.0006 -0.2923  
 -0.0145 -0.0009 -0.7672 -0.0168 -0.0028  
 -0.0178 -0.0005 -0.0001 -0.0150 -0.0003  
 -0.0010 0.0203 0.0137

58. (1.97146) LP ( 1) O 9 s( 38.25%)p 1.61( 61.72%)d 0.00( 0.03%)  
 -0.0002 0.6185 0.0042 0.0002 -0.2477  
 -0.0019 -0.0010 0.7455 0.0045 0.0025  
 0.0067 0.0000 0.0000 0.0096 0.0001  
 -0.0002 0.0136 0.0079

59. (1.73882) LP ( 2) O 9 s( 0.00%)p 1.00( 99.93%)d 0.00( 0.07%)  
 0.0000 0.0001 0.0000 0.0000 -0.0200  
 0.0000 0.0000 -0.0156 0.0000 0.0000  
 0.9993 -0.0004 -0.0011 0.0004 0.0072  
 -0.0246 -0.0005 -0.0004

60. (1.05958) LP ( 1) C 10 s( 0.00%)p 1.00(100.00%)d 0.00( 0.00%)  
 0.0000 0.0000 0.0001 0.0000 -0.0204  
 -0.0001 0.0000 -0.0126 0.0001 0.0000  
 0.9997 -0.0035 0.0014 0.0000 -0.0046  
 0.0008 0.0001 -0.0002

61. (1.00156) LP\*( 1) C 15 s( 0.00%)p 1.00( 99.99%)d 0.00( 0.01%)  
 0.0000 0.0029 0.0033 0.0000 0.0193  
 -0.0052 0.0005 0.0092 -0.0017 0.0000  
 -0.9997 0.0094 -0.0031 0.0000 -0.0072  
 0.0008 0.0004 -0.0003

62. (1.94340) LP ( 1) O 16 s( 36.57%)p 1.73( 63.39%)d 0.00( 0.04%)  
 -0.0002 0.6047 0.0041 0.0003 -0.2531  
 -0.0036 0.0005 0.7509 0.0029 0.0022  
 -0.0771 -0.0004 -0.0005 0.0089 -0.0019  
 0.0041 0.0155 0.0072

63. (1.84122) LP ( 2) O 16 s( 0.17%)p 99.99( 99.78%)d 0.31( 0.05%)  
 0.0000 0.0415 -0.0004 0.0000 -0.0311  
 0.0000 -0.0001 -0.1453 -0.0012 0.0002  
 -0.9878 -0.0027 0.0001 0.0006 -0.0026  
 0.0214 -0.0031 -0.0071

64. (1.99084) LP ( 1) F 18 s( 73.02%)p 0.37( 26.98%)d 0.00( 0.00%)  
 -0.0002 0.8545 0.0030 0.0002 -0.4608  
 0.0066 -0.0027 0.2397 -0.0036 0.0013  
 -0.0021 0.0001 0.0000 0.0040 0.0000  
 0.0000 -0.0027 0.0028

65. (1.94339) LP ( 2) F 18 s( 0.00%)p 1.00( 99.97%)d 0.00( 0.03%)  
 0.0000 0.0042 -0.0003 0.0000 -0.4523  
 -0.0022 -0.0002 -0.8834 -0.0042 -0.0008

0.1207 0.0005 0.0001 -0.0097 0.0017  
 -0.0012 -0.0143 -0.0004  
 66. (1.93655) LP ( 3) F 18 s( 0.00%)p 1.00( 99.97%)d 0.00( 0.03%)  
 0.0000 0.0003 -0.0001 0.0000 0.0527  
 0.0003 0.0001 0.1086 0.0007 0.0001  
 0.9925 0.0057 0.0010 0.0014 0.0161  
 -0.0077 0.0017 0.0000  
 67. (1.99077) LP ( 1) F 19 s( 73.99%)p 0.35( 26.01%)d 0.00( 0.00%)  
 -0.0002 0.8602 0.0027 0.0002 0.0009  
 0.0005 -0.0002 -0.3534 0.0054 -0.0020  
 -0.3675 0.0058 -0.0021 -0.0002 -0.0001  
 -0.0044 0.0022 -0.0016  
 68. (1.94821) LP ( 2) F 19 s( 0.00%)p 1.00( 99.97%)d 0.00( 0.03%)  
 0.0000 0.0035 -0.0007 0.0001 -0.6775  
 -0.0034 -0.0006 -0.5267 -0.0021 -0.0005  
 0.5131 0.0015 0.0006 -0.0077 -0.0081  
 -0.0005 0.0058 0.0107  
 69. (1.94052) LP ( 3) F 19 s( 0.00%)p 1.00( 99.97%)d 0.00( 0.03%)  
 0.0000 -0.0020 0.0022 0.0000 0.7353  
 0.0044 0.0007 -0.4898 -0.0025 -0.0007  
 0.4681 0.0029 0.0005 0.0083 0.0095  
 -0.0005 0.0065 0.0096  
 70. (1.99068) LP ( 1) F 20 s( 73.81%)p 0.35( 26.18%)d 0.00( 0.00%)  
 -0.0002 0.8591 0.0027 0.0002 0.0596  
 -0.0007 0.0002 -0.2461 0.0036 -0.0014  
 0.4446 -0.0070 0.0026 0.0004 -0.0009  
 0.0038 0.0011 -0.0035  
 71. (1.94700) LP ( 2) F 20 s( 0.00%)p 1.00( 99.97%)d 0.00( 0.03%)  
 0.0000 0.0020 0.0004 -0.0001 0.6919  
 0.0033 0.0006 0.6681 0.0029 0.0006  
 0.2732 0.0007 0.0004 0.0041 -0.0107  
 -0.0077 -0.0065 -0.0069  
 72. (1.93962) LP ( 3) F 20 s( 0.00%)p 1.00( 99.97%)d 0.00( 0.03%)  
 0.0000 0.0058 -0.0018 0.0000 -0.7130  
 -0.0041 -0.0006 0.5740 0.0031 0.0007  
 0.4022 0.0028 0.0005 -0.0066 0.0104  
 -0.0055 -0.0038 -0.0103  
 73. (0.00470) RY\*( 1) C 1 s( 1.71%)p 54.17( 92.61%)d 3.33( 5.68%)  
 0.0000 0.0213 0.1290 0.0029 -0.0330  
 0.8306 0.0314 -0.0080 0.4831 0.0115  
 -0.0008 0.0239 0.0008 0.1314 0.0072  
 0.0005 0.1952 -0.0377  
 74. (0.00150) RY\*( 2) C 1 s( 1.17%)p 84.16( 98.60%)d 0.19( 0.22%)  
 0.0000 -0.0068 0.1073 -0.0127 -0.0096  
 -0.4924 0.1458 0.0444 0.8115 -0.2485  
 0.0005 0.0033 -0.0011 -0.0260 0.0012  
 0.0001 0.0186 -0.0350  
 75. (0.00099) RY\*( 3) C 1 s( 0.00%)p 1.00( 69.40%)d 0.44( 30.60%)  
 0.0000 0.0000 0.0001 0.0000 0.0000  
 -0.0162 -0.0020 0.0000 -0.0132 -0.0015  
 0.0021 0.8269 0.0992 -0.0017 0.4685  
 -0.2937 -0.0138 0.0079



76. (0.00042) RY\*( 4) C 1 s( 91.33%)p 0.04( 3.53%)d 0.06( 5.14%)  
0.0000 -0.0099 0.9502 -0.1011 0.0309  
-0.0662 0.0028 0.0020 -0.1678 0.0425  
0.0006 -0.0041 0.0007 -0.0933 0.0066  
0.0013 0.1024 -0.1794

77. (0.00039) RY\*( 5) C 1 s( 0.00%)p 1.00( 19.53%)d 4.12( 80.47%)  
0.0000 0.0000 0.0001 0.0000 0.0002  
-0.0086 -0.0006 0.0002 -0.0070 -0.0005  
-0.0097 0.4402 0.0365 -0.0132 -0.2442  
0.8627 0.0185 0.0153

78. (0.00010) RY\*( 6) C 1 s( 4.24%)p 6.90( 29.27%)d15.67( 66.49%)  
0.0000 0.0010 0.1010 0.1795 -0.0088  
-0.1627 -0.5127 0.0053 -0.0069 -0.0557  
-0.0001 -0.0033 -0.0110 0.6710 0.0063  
-0.0008 0.3349 0.3200

79. (0.00007) RY\*( 7) C 1 s( 1.80%)p12.54( 22.60%)d41.94( 75.59%)

80. (0.00003) RY\*( 8) C 1 s( 17.35%)p 1.96( 33.99%)d 2.80( 48.66%)

81. (0.00003) RY\*( 9) C 1 s( 2.97%)p26.34( 78.19%)d 6.35( 18.84%)

82. (0.00001) RY\*(10) C 1 s( 0.02%)p99.99( 11.23%)d99.99( 88.75%)

83. (0.00000) RY\*(11) C 1 s( 0.01%)p 1.00( 99.87%)d 0.00( 0.13%)

84. (0.00000) RY\*(12) C 1 s( 74.31%)p 0.32( 23.44%)d 0.03( 2.24%)

85. (0.00001) RY\*(13) C 1 s( 5.13%)p 3.49( 17.87%)d15.02( 77.00%)

86. (0.00692) RY\*( 1) C 2 s( 0.84%)p96.77( 81.71%)d20.66( 17.45%)  
0.0000 -0.0062 0.0897 0.0191 0.0067  
0.8656 0.0277 0.0569 0.2310 -0.0997  
0.0010 0.0207 -0.0010 -0.3370 0.0011  
-0.0090 0.2415 -0.0500

87. (0.00501) RY\*( 2) C 2 s( 0.58%)p99.99( 98.52%)d 1.57( 0.90%)  
0.0000 0.0331 0.0615 -0.0296 -0.0539  
0.2227 0.0611 -0.0171 -0.9617 0.0613  
-0.0013 -0.0108 0.0022 -0.0890 -0.0004  
-0.0008 -0.0043 -0.0330

88. (0.00173) RY\*( 3) C 2 s( 0.00%)p 1.00( 25.36%)d 2.94( 74.64%)  
0.0000 0.0000 0.0000 0.0000 -0.0005  
-0.0099 -0.0002 -0.0004 -0.0079 -0.0002  
0.0233 0.5027 0.0105 -0.0205 0.7395  
0.4446 -0.0074 0.0373

89. (0.00078) RY\*( 4) C 2 s( 0.00%)p 1.00( 60.62%)d 0.65( 39.38%)  
0.0000 0.0000 0.0001 0.0000 -0.0003  
0.0152 0.0016 -0.0003 0.0123 0.0012  
0.0172 -0.7742 -0.0785 -0.0144 0.1615  
0.6058 0.0064 0.0222

90. (0.00049) RY\*( 5) C 2 s( 1.92%)p13.30( 25.55%)d37.75( 72.53%)  
0.0000 -0.0043 0.1132 0.0799 0.0028  
-0.3477 0.2622 0.0013 -0.0116 0.2561  
0.0001 -0.0070 0.0092 -0.3652 0.0102  
-0.0186 0.7686 -0.0281

91. (0.00034) RY\*( 6) C 2 s( 83.22%)p 0.01( 0.71%)d 0.19( 16.07%)  
0.0000 -0.0139 0.9085 -0.0810 0.0460  
-0.0151 -0.0520 -0.0114 0.0330 -0.0284  
0.0007 0.0003 -0.0014 0.2791 0.0145  
0.0130 0.0175 -0.2866

92. (0.00010) RY\*( 7) C 2 s( 13.31%)p 0.44( 5.86%)d 6.07( 80.82%)  
 93. (0.00005) RY\*( 8) C 2 s( 5.26%)p12.86( 67.62%)d 5.16( 27.12%)  
 94. (0.00000) RY\*( 9) C 2 s( 90.50%)p 0.05( 4.47%)d 0.06( 5.03%)  
 95. (0.00001) RY\*(10) C 2 s( 0.94%)p92.81( 87.01%)d12.86( 12.06%)  
 96. (0.00001) RY\*(11) C 2 s( 0.00%)p 1.00( 14.36%)d 5.96( 85.64%)  
 97. (0.00000) RY\*(12) C 2 s( 0.00%)p 1.00( 99.80%)d 0.00( 0.20%)  
 98. (0.00001) RY\*(13) C 2 s( 3.44%)p 8.37( 28.75%)d19.74( 67.82%)  
 99. (0.00380) RY\*( 1) N 3 s( 1.94%)p48.10( 93.40%)d 2.40( 4.66%)  
 0.0000 -0.0087 0.1390 0.0036 -0.0022  
 -0.0603 -0.0198 -0.0292 -0.9629 0.0394  
 -0.0005 -0.0164 0.0002 -0.0806 0.0030  
 -0.0045 0.2000 -0.0094  
 100. (0.00169) RY\*( 2) N 3 s( 0.02%)p99.99( 98.69%)d78.39( 1.29%)  
 0.0000 0.0054 0.0112 0.0030 0.0316  
 -0.9877 -0.0770 0.0009 0.0628 0.0141  
 0.0006 -0.0183 -0.0013 0.1094 0.0022  
 0.0016 0.0298 0.0054  
 101. (0.00062) RY\*( 3) N 3 s( 0.00%)p 1.00( 97.63%)d 0.02( 2.37%)  
 0.0000 0.0000 0.0003 0.0000 0.0002  
 -0.0192 0.0004 0.0002 -0.0156 0.0005  
 -0.0122 0.9873 -0.0287 0.0007 -0.1338  
 0.0761 0.0037 -0.0025  
 102. (0.00038) RY\*( 4) N 3 s( 78.36%)p 0.14( 10.98%)d 0.14( 10.66%)  
 0.0000 0.0007 0.8837 0.0525 -0.0116  
 0.0541 -0.2291 -0.0123 0.0756 0.2199  
 -0.0005 0.0028 -0.0013 0.2175 0.0012  
 0.0038 -0.2087 0.1255  
 103. (0.00037) RY\*( 5) N 3 s( 0.00%)p 1.00( 1.98%)d49.47( 98.02%)  
 0.0000 0.0000 0.0055 0.0003 -0.0003  
 0.0029 -0.0021 -0.0002 0.0026 0.0008  
 0.0100 -0.1357 0.0356 0.0162 -0.9885  
 0.0371 0.0188 -0.0318  
 104. (0.00011) RY\*( 6) N 3 s( 3.79%)p 2.39( 9.07%)d22.99( 87.14%)  
 0.0000 -0.0032 0.1934 -0.0221 0.0379  
 -0.0733 -0.2573 -0.0030 0.1145 -0.0674  
 0.0007 0.0004 -0.0061 -0.9243 -0.0101  
 -0.0147 0.0041 -0.1293  
 105. (0.00004) RY\*( 7) N 3 s( 5.02%)p 5.29( 26.52%)d13.65( 68.47%)  
 106. (0.00002) RY\*( 8) N 3 s( 0.00%)p 1.00( 1.46%)d67.35( 98.54%)  
 107. (0.00001) RY\*( 9) N 3 s( 0.44%)p26.18( 11.63%)d99.99( 87.93%)  
 108. (0.00001) RY\*(10) N 3 s( 1.08%)p59.06( 63.80%)d32.52( 35.12%)  
 109. (0.00002) RY\*(11) N 3 s( 10.64%)p 8.05( 85.64%)d 0.35( 3.72%)  
 110. (0.00000) RY\*(12) N 3 s( 98.71%)p 0.01( 0.54%)d 0.01( 0.75%)  
 111. (0.00000) RY\*(13) N 3 s( 0.00%)p 1.00( 99.09%)d 0.01( 0.91%)  
 112. (0.00813) RY\*( 1) C 4 s( 15.50%)p 5.03( 78.00%)d 0.42( 6.50%)  
 0.0000 -0.0678 0.3850 0.0474 0.0120  
 0.0767 -0.0122 0.0530 0.8771 -0.0389  
 0.0011 0.0154 -0.0009 -0.0223 0.0053  
 -0.0040 0.2532 -0.0181  
 113. (0.00611) RY\*( 2) C 4 s( 17.03%)p 3.83( 65.19%)d 1.04( 17.77%)  
 0.0000 0.0091 0.4109 -0.0374 0.0168  
 -0.7845 -0.0176 0.0095 -0.1879 -0.0109

0.0005 -0.0185 -0.0005 0.2928 0.0133  
 0.0038 0.2878 -0.0948  
 114. (0.00480) RY\*( 3) C 4 s( 45.75%)p 0.66( 30.16%)d 0.53( 24.09%)  
 0.0000 0.0194 0.6760 -0.0129 -0.0175  
 0.3733 -0.0420 0.0212 -0.3988 0.0260  
 0.0000 0.0012 -0.0004 -0.4367 0.0007  
 -0.0091 0.2005 -0.0994  
 115. (0.00270) RY\*( 4) C 4 s( 0.00%)p 1.00( 0.72%)d99.99( 99.28%)  
 0.0000 0.0000 0.0001 -0.0001 -0.0001  
 0.0018 0.0006 0.0000 0.0012 0.0006  
 0.0032 -0.0764 -0.0368 0.0117 -0.9787  
 0.1831 0.0220 -0.0284  
 116. (0.00102) RY\*( 5) C 4 s( 0.00%)p 1.00( 63.29%)d 0.58( 36.71%)  
 0.0000 0.0000 0.0002 -0.0001 -0.0005  
 0.0155 0.0012 -0.0004 0.0125 0.0009  
 0.0258 -0.7919 -0.0691 0.0124 -0.0479  
 -0.6035 -0.0090 -0.0181  
 117. (0.00065) RY\*( 6) C 4 s( 4.78%)p 4.70( 22.48%)d15.20( 72.73%)  
 0.0000 -0.0107 0.1965 -0.0955 -0.0151  
 -0.3559 -0.0027 -0.0057 0.1323 -0.2835  
 -0.0004 -0.0056 -0.0046 -0.4627 -0.0208  
 0.0040 -0.7161 -0.0039  
 118. (0.00057) RY\*( 7) C 4 s( 0.00%)p 1.00( 36.13%)d 1.77( 63.87%)  
 0.0000 0.0000 -0.0002 0.0002 0.0001  
 0.0126 0.0009 0.0001 0.0092 0.0010  
 -0.0035 -0.5998 -0.0361 -0.0173 0.1924  
 0.7749 0.0097 0.0277  
 119. (0.00024) RY\*( 8) C 4 s( 14.12%)p 1.26( 17.84%)d 4.82( 68.04%)  
 0.0000 0.0075 0.3681 -0.0746 0.0048  
 0.3297 0.0024 -0.0043 -0.0587 -0.2573  
 0.0000 0.0058 -0.0040 0.7085 0.0044  
 0.0216 -0.4197 -0.0423  
 120. (0.00008) RY\*( 9) C 4 s( 0.67%)p99.99( 98.11%)d 1.83( 1.22%)  
 121. (0.00004) RY\*(10) C 4 s( 17.18%)p 3.88( 66.73%)d 0.94( 16.08%)  
 122. (0.00001) RY\*(11) C 4 s( 84.57%)p 0.18( 14.97%)d 0.01( 0.46%)  
 123. (0.00001) RY\*(12) C 4 s( 0.84%)p 7.45( 6.27%)d99.99( 92.89%)  
 124. (0.00000) RY\*(13) C 4 s( 0.01%)p 1.00( 99.88%)d 0.00( 0.11%)  
 125. (0.00524) RY\*( 1) C 5 s( 47.27%)p 0.92( 43.55%)d 0.19( 9.18%)  
 0.0000 0.0244 0.6869 -0.0164 -0.0061  
 -0.0937 0.0072 -0.0095 0.6530 -0.0059  
 -0.0003 0.0084 0.0001 0.0813 0.0107  
 0.0006 0.2672 -0.1167

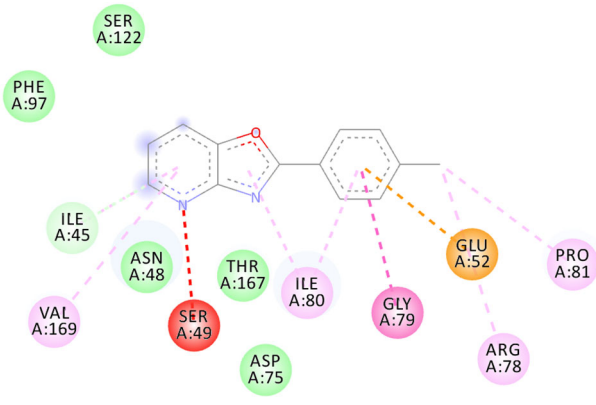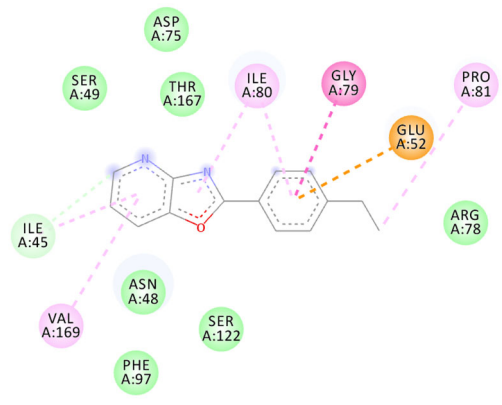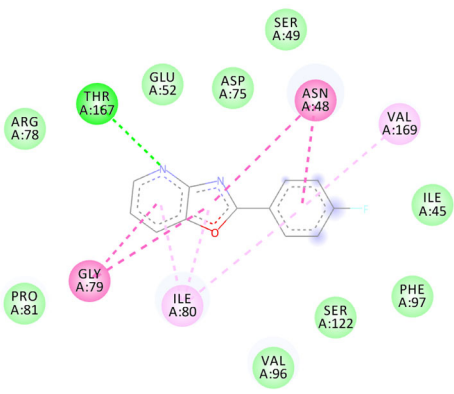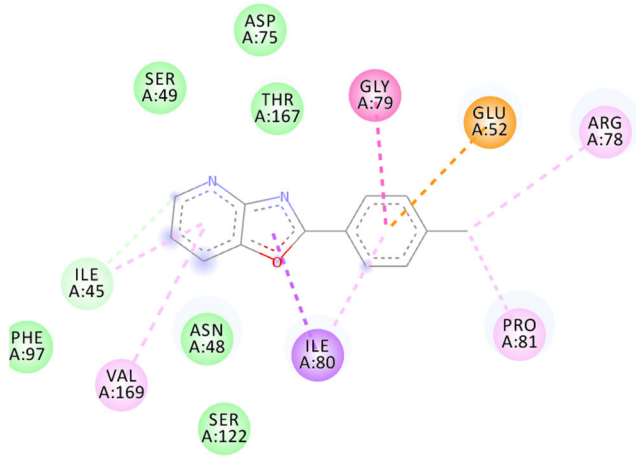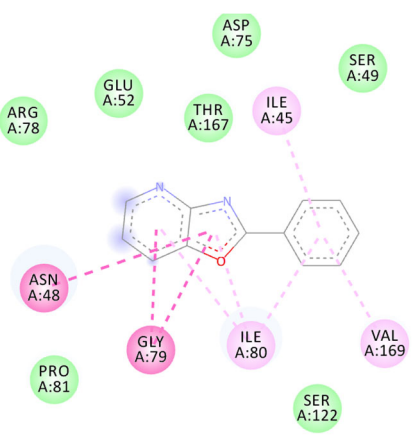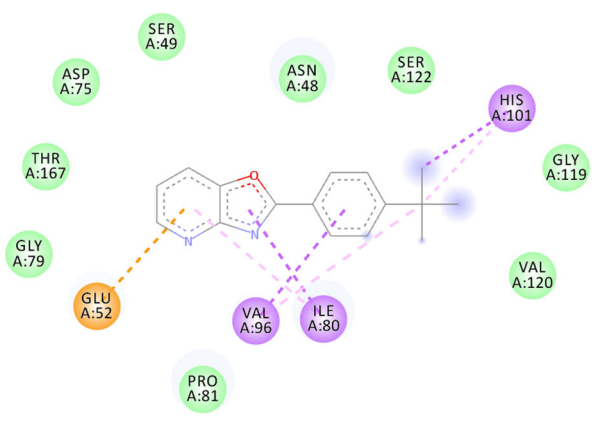

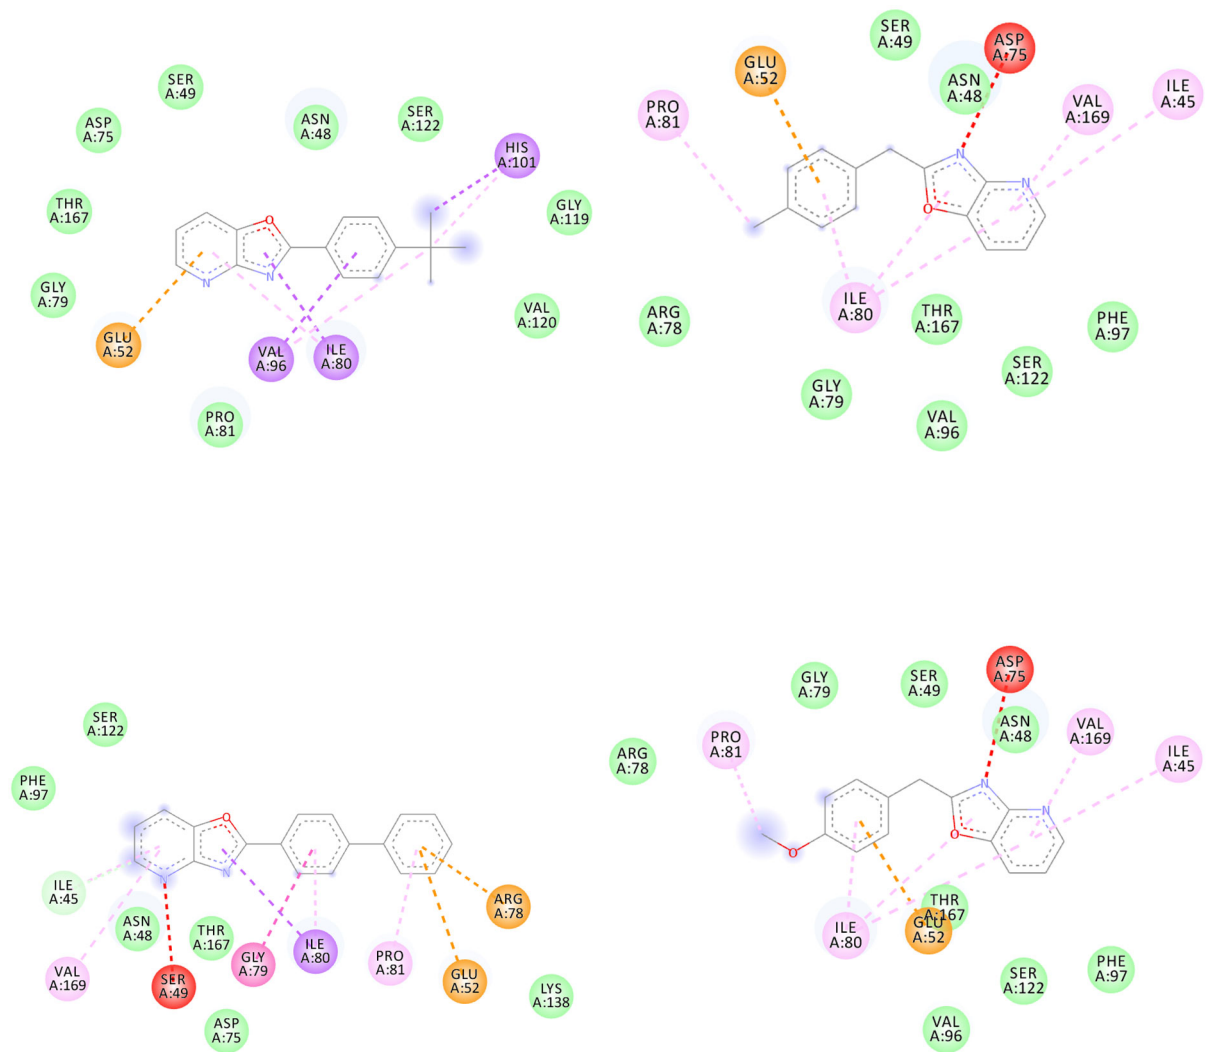

**Figure S1.** 2D diagram of the interactions of compounds at the DNA gyrase active site.
